# Supplementary material for: A novel mechanosensitive channel controls osmoregulation, differentiation, and infectivity in Trypanosoma cruzi
Source: eLife. 2021 Jul 2;10:e67449. doi: 10.7554/eLife.67449 (PMC8282336; doi:10.7554/eLife.67449)
Supplement: Figure 2—source data 1. [file elife-67449-fig2-data1.xlsx]

## Sheet: I-V_curves
TcMscS	Pipette		Symm			Asymm					Asymmetric
	Em, mV		current, pA	STD	STD/2	current, pA	STD	STD/2		Em, mV	fitted range
	-40		-15.6	0.6	0.3	-20.1	2.1	1.05		-40	-20.1
	-30		-11.7	0.5	0.25	-14.1	2	1		-30	-14.1
	-20		-8.6	0.5	0.25	-10.1	2	1		-20	-10.1
	-10		-5.2	0.3	0.15	-5.1	2	1
	0		-0.5	0.1	0.05	2.5	0.5	0.25		0	2.5
	10		3.2	0.2	0.1	6.9	2	1		10	6.9
	20		8	0.4	0.2	12.9	2	1		20	12.9
	30		11.9	0.5	0.25	17	2	1		30	17
	40		15.6	1	0.5	19.9	2	1		40

## Sheet: Dose-Response_Curves
	TcMscS								EcMscS
	Tension								Tension
	mN/m		Po	STD	STD/2				mN/m		Po	STD	STD/2
	0		0	0	0				0		0	0	0
	1.48		0	0	0				1.16		0	0	0
	2.96		0	0	0				2.32		0	0	0
	4.44		0	0	0				3.48		0	0	0
	5.92		0	0	0				4.64		0	0	0
	7.4		0.04	0.031	0.0155				5.8		0	0	0
	8.88		0.1	0.053	0.0265				6.96		0.087	0.033	0.0165
	10.36		0.24	0.096	0.048				7.56		0.33	0.069	0.0345
	11.84		0.4	0.193	0.0965				8.12		0.66	0.089	0.0445
	13.36		0.6	0.226	0.113				8.72		0.87	0.069	0.0345
	14.84		0.8	0.136	0.068				9.28		0.94	0.047	0.0235
	16.32		0.85	0.14	0.07				9.88		0.97	0.044	0.022
	17.8		0.9	0.11	0.055				10.44		0.99	0.04	0.02
	19.28		0.92	0.148	0.074				11.04		1	0.01	0.005
	20.76		0.95	0.089	0.0445
	22.24		0.97	0.053	0.0265
	23.72		0.98	0.033	0.0165
	24.44		1	0.03	0.015
