# Supplementary material for: A novel mechanosensitive channel controls osmoregulation, differentiation, and infectivity in Trypanosoma cruzi
Source: eLife. 2021 Jul 2;10:e67449. doi: 10.7554/eLife.67449 (PMC8282336; doi:10.7554/eLife.67449)
Supplement: Figure 3—source data 1. [file elife-67449-fig3-data1.xlsx]

## Sheet: All data
	Trypos	Amas	Epis Exp	Epis Stat		Trypos WT	Trypos Cas9	Trypos KO		Epis WT	Epis Cas9	Epis KD	Epis KO			Epis WT	Epis Cas9	Epis KD	Epis KO
	1	1.20319	2.1304	0.73068		1	0.957	0.1431		1	1.05555	0.98133	0.00309702			1	1.05555	0.98133	0.00309702
	1	1.1287	2.818	0.31417		1	0.864	0.00837		1	1.31	1.24	0.000153457			1	1.31		0.000153457
	1	1.39622	1.3355	1.00049		1	0.9105	0.01		1	1.79834	1.39152	1.13522e-05			1	1.79834		1.13522e-05
	1	1.8161	2.84272	0.5874		1		0.0214791				0.8389	1.91e-05					0.8389	1.91e-05
	1		1.3064			1		0.0053				0.101063	0.000153					0.101063	0.000153

## Sheet: Stats
Trypos		Amas		Epis Exp		Epis Stat
Mean	1	Mean	1.38605	Mean	2.0866	Mean	0.658184
Standard Error	0	Standard Error	0.154033	Standard Error	0.337746	Standard Error	0.143115
Median	1	Median	1.29971	Median	2.1304	Median	0.65904
Mode	1	Mode	#N/A	Mode	#N/A	Mode	#N/A
Standard Deviation	0	Standard Deviation	0.308065	Standard Deviation	0.755223	Standard Deviation	0.28623
Sample Variance	0	Sample Variance	0.0949041	Sample Variance	0.570361	Sample Variance	0.0819274
Kurtosis	#DIV/0!	Kurtosis	1.19543	Kurtosis	-2.99776	Kurtosis	0.299631
Skewness	#DIV/0!	Skewness	1.28549	Skewness	-0.0725945	Skewness	-0.0164448
Range	0	Range	0.6874	Range	1.53632	Range	0.686316
Minimum	1	Minimum	1.1287	Minimum	1.3064	Minimum	0.31417
Maximum	1	Maximum	1.8161	Maximum	2.84272	Maximum	1.00049
Sum	5	Sum	5.54421	Sum	10.433	Sum	2.63274
Count	5	Count	4	Count	5	Count	4
Confidence Level(95.0%)	0	Confidence Level(95.0%)	0.4902	Confidence Level(95.0%)	0.937733	Confidence Level(95.0%)	0.455455

## Sheet: ANOVA life stages
Anova: Single Factor
SUMMARY
Groups	Count	Sum	Average	Variance
Trypos	5	5	1	0
Amas	4	5.54421	1.38605	0.0949041
Epis Exp	5	10.433	2.0866	0.570361
Epis Stat	4	2.63274	0.658184	0.0819274
ANOVA
Source of Variation	SS	df	MS	F	P-value	F crit
Between Groups	5.21861	3	1.73954	8.66076	0.00168826	3.34389
Within Groups	2.81194	14	0.200853
Total	8.03055	17
t-Test: Two-Sample Assuming Equal Variances				t-Test: Two-Sample Assuming Equal Variances				t-Test: Two-Sample Assuming Equal Variances				t-Test: Two-Sample Assuming Equal Variances
	Trypos	Amas			Trypos	Epis Exp			Trypos	Epis Stat			Epis Exp	Epis Stat
Mean	1	1.38605		Mean	1	2.0866		Mean	1	0.658184		Mean	2.0866	0.658184
Variance	0	0.0949041		Variance	0	0.570361		Variance	0	0.0819274		Variance	0.570361	0.0819274
Observations	5	4		Observations	5	5		Observations	5	4		Observations	5	4
Pooled Variance	0.0406732			Pooled Variance	0.285181			Pooled Variance	0.0351118			Pooled Variance	0.361032
Hypothesized Mean Difference	0			Hypothesized Mean Difference	0			Hypothesized Mean Difference	0			Hypothesized Mean Difference	0
df	7			df	8			df	7			df	7
t Stat	-2.85356			t Stat	-3.21722			t Stat	2.71932			t Stat	3.54386
P(T<=t) one-tail	0.0122815			P(T<=t) one-tail	0.00614514			P(T<=t) one-tail	0.0148975			P(T<=t) one-tail	0.00471048
t Critical one-tail	1.89458			t Critical one-tail	1.85955			t Critical one-tail	1.89458			t Critical one-tail	1.89458
P(T<=t) two-tail	0.024563			P(T<=t) two-tail	0.0122903			P(T<=t) two-tail	0.029795			P(T<=t) two-tail	0.00942096
t Critical two-tail	2.36462			t Critical two-tail	2.306			t Critical two-tail	2.36462			t Critical two-tail	2.36462
