# Supplementary material for: A novel mechanosensitive channel controls osmoregulation, differentiation, and infectivity in Trypanosoma cruzi
Source: eLife. 2021 Jul 2;10:e67449. doi: 10.7554/eLife.67449 (PMC8282336; doi:10.7554/eLife.67449)
Supplement: Figure 5—figure supplement 2—source data 1. [file elife-67449-fig5-figsupp2-data1.xlsx]

## Sheet: Fig 5 Suppl 2 B
Epis WT	Epis Cas9	Epis KD	Epis KO
1	1.05555	0.98133	0.00309702
1	1.31	0.8389	0.000153457
1	1.79834	0.101063	1.13522e-05
			1.91e-05
			0.000153
Anova: Single Factor
SUMMARY
Groups	Count	Sum	Average	Variance
Epis WT	3	3	1	0
Epis Cas9	3	4.16389	1.38796	0.142493
Epis KD	3	3.61285	1.20428	0.0430217
Epis KO	5	0.00343393	0.000686786	1.82015e-06
ANOVA
Source of Variation	SS	df	MS	F	P-value	F crit
Between Groups	4.82936	3	1.60979	43.3863	4.85371e-06	3.70826
Within Groups	0.371036	10	0.0371036
Total	5.2004	13
t-Test: Two-Sample Assuming Equal Variances				t-Test: Two-Sample Assuming Equal Variances				t-Test: Two-Sample Assuming Equal Variances				t-Test: Two-Sample Assuming Equal Variances				t-Test: Two-Sample Assuming Unequal Variances
	Epis WT	Epis Cas9			Epis WT	Epis KD			Epis WT	Epis KO			Epis Cas9	Epis KO			Epis Cas9	Epis KD
Mean	1	1.38796		Mean	1	1.20428		Mean	1	0.000686786		Mean	1.38796	0.000686786		Mean	1.38796	0.640431
Variance	0	0.142493		Variance	0	0.0430217		Variance	0	1.82015e-06		Variance	0.142493	1.82015e-06		Variance	0.142493	0.22326
Observations	3	3		Observations	3	3		Observations	3	5		Observations	3	5		Observations	3	3
Pooled Variance	0.0712464			Pooled Variance	0.0215108			Pooled Variance	1.21343e-06			Pooled Variance	0.0474988			Hypothesized Mean Difference	0
Hypothesized Mean Difference	0			Hypothesized Mean Difference	0			Hypothesized Mean Difference	0			Hypothesized Mean Difference	0			df	4
df	4			df	4			df	6			df	6			t Stat	2.14091
t Stat	-1.78015			t Stat	-1.7059			t Stat	1242.21			t Stat	8.71611			P(T<=t) one-tail	0.0494935
P(T<=t) one-tail	0.0748292			P(T<=t) one-tail	0.0816115			P(T<=t) one-tail	9.18553e-18			P(T<=t) one-tail	6.30372e-05			t Critical one-tail	2.13185
t Critical one-tail	2.13185			t Critical one-tail	2.13185			t Critical one-tail	1.94318			t Critical one-tail	1.94318			P(T<=t) two-tail	0.098987
P(T<=t) two-tail	0.149658			P(T<=t) two-tail	0.163223			P(T<=t) two-tail	1.83711e-17			P(T<=t) two-tail	0.000126074			t Critical two-tail	2.77645
t Critical two-tail	2.77645			t Critical two-tail	2.77645			t Critical two-tail	2.44691			t Critical two-tail	2.44691

## Sheet: Fig 5 Suppl 2 C
DDCq values
	Exp 1	Exp 2	Exp 3	Exp 4	Exp 5	Averages	SD
Trypos WT	1	1	1	1	1	1	0
Trypos Cas9		0.957			0.864	0.9105	0.0657609
Trypos KO	0.1431	0.00837	0.01	0.0214791	0.0053	0.0112873	0.0592654
Anova: Single Factor
SUMMARY
Groups	Count	Sum	Average	Variance
Trypos WT	5	5	1	0
Trypos Cas9	3	2.7315	0.9105	0.00216225
Trypos KO	5	0.188249	0.0376498	0.00351239
ANOVA
Source of Variation	SS	df	MS	F	P-value	F crit
Between Groups	2.66932	2	1.33466	726.382	1.49324e-11	4.10282
Within Groups	0.0183741	10	0.00183741
Total	2.68769	12
t-Test: Two-Sample Assuming Equal Variances				t-Test: Two-Sample Assuming Equal Variances				t-Test: Two-Sample Assuming Equal Variances
	Trypos WT	Trypos Cas9			Trypos WT	Trypos KO			Trypos Cas9	Trypos KO
Mean	1	0.9105		Mean	1	0.0376498		Mean	0.9105	0.0376498
Variance	0	0.00216225		Variance	0	0.00351239		Variance	0.00216225	0.00351239
Observations	5	3		Observations	5	5		Observations	3	5
Pooled Variance	0.00072075			Pooled Variance	0.0017562			Pooled Variance	0.00306234
Hypothesized Mean Difference	0			Hypothesized Mean Difference	0			Hypothesized Mean Difference	0
df	6			df	8			df	6
t Stat	4.5649			t Stat	36.3092			t Stat	21.598
P(T<=t) one-tail	0.00191552			P(T<=t) one-tail	1.81383e-10			P(T<=t) one-tail	3.2153e-07
t Critical one-tail	1.94318			t Critical one-tail	1.85955			t Critical one-tail	1.94318
P(T<=t) two-tail	0.00383104			P(T<=t) two-tail	3.62765e-10			P(T<=t) two-tail	6.4306e-07
t Critical two-tail	2.44691			t Critical two-tail	2.306			t Critical two-tail	2.44691
