# Supplementary material for: A novel mechanosensitive channel controls osmoregulation, differentiation, and infectivity in Trypanosoma cruzi
Source: eLife. 2021 Jul 2;10:e67449. doi: 10.7554/eLife.67449 (PMC8282336; doi:10.7554/eLife.67449)
Supplement: Figure 5—figure supplement 3—source data 1. [file elife-67449-fig5-figsupp3-data1.xlsx]

## Sheet: Fig 5 Suppl 3 B
counts e6/ml	Day 1	Day 2	Day 3	Day 4	Day 5	Day 6	Day 7
WT Y	1	2.37	4.56	8.11	15.4	20.9	31.4
KO	1	1.24	1.645	2.275	3.14	4.293	5.7591
C1	1	0.948	1.52	1.84	1.93	2.69	2.74
C2	1	1.1	1.006	1.13	1.22	1.226	1.23
C3	1	1.78	2.38	3.52	5.29	10.4	15.2
