# Supplementary material for: A novel mechanosensitive channel controls osmoregulation, differentiation, and infectivity in Trypanosoma cruzi
Source: eLife. 2021 Jul 2;10:e67449. doi: 10.7554/eLife.67449 (PMC8282336; doi:10.7554/eLife.67449)
Supplement: Figure 5—source data 1. [file elife-67449-fig5-data1.xlsx]

## Sheet: Fig 5 C
Figure 5 and supplement 1-B
	Day 0				Day 1				Day 2				Day 3				Day 4				Day 5				Day 6				Day 7				Day 8				Day 10
	A	B	Ave	SD	A	B	Ave	SD	A	B	Ave	SD	A	B	Ave	SD	A	B	Ave	SD	A	B	Ave	SD	A	B	Ave	SD	A	B	Ave	SD	A	B	Ave	SD	A	B	Ave	SD
Epis Y WT	1000000	1000000	1000000	0	1800000	1890000	1845000	63639.6	4340000	4760000	4550000	296985	9570000	9560000	9565000	7071.07	16800000	17800000	17300000	707107	24030000	23355000	23692500	477297	3.15293e+07	3.19849e+07	3.17571e+07	322176	33700000	37900000	35800000	2.96985e+06	35300000	38200000	36750000	2.05061e+06	39700000	44100000	41900000	3.11127e+06
Epis Cas9	1000000	1000000	1000000	0	1300000	1410000	1355000	77781.7	3650000	2380000	3015000	898026	3510000	3670000	3590000	113137	5300000	4700000	5000000	424264	6345000	6750000	6547500	286378	9112500	8839125	8.97581e+06	193305	12000000	13000000	12500000	707107	13600000	15800000	14700000	1.55563e+06	20300000	24100000	22200000	2.68701e+06
sg2col5	1000000	1000000	1000000	0	1230000	1170000	1200000	42426.4	2120000	1930000	2025000	134350	3110000	3100000	3105000	7071.07	4870000	4440000	4655000	304056	5994000	6284250	6139125	205238	8.48374e+06	8.28782e+06	8.38578e+06	138535	8850000	8000000	8425000	601041	12300000	9520000	10910000	1.96576e+06	13200000	12000000	12600000	848528
sg3col2	1000000	1000000	1000000	0	1590000	2260000	1925000	473762	3580000	4080000	3830000	353553	3810000	3790000	3800000	14142.1	3460000	3600000	3530000	98994.9	4860000	4765500	4812750	66821.6	6433425	6.49721e+06	6.46532e+06	45104.6	20500000	23000000	21750000	1.76777e+06	28000000	32200000	30100000	2.96985e+06	41100000	44900000	43000000	2.68701e+06
5'Blasti3' sg2col5	1000000	1000000	1000000	0	1420000	1290000	1355000	91923.9	2140000	2160000	2150000	14142.1	2700000	2960000	2830000	183848	4880000	4510000	4695000	261630	6088500	6338250	6213375	176600	8.55664e+06	8.38806e+06	8.47235e+06	119205	13200000	11600000	12400000	1.13137e+06	17400000	17300000	17350000	70710.7	32800000	29400000	31100000	2.40416e+06
100bp-Blasti3' sg2col5	1000000	1000000	1000000	0	1280000	1200000	1240000	56568.5	1630000	1660000	1645000	21213.2	2280000	2270000	2275000	7071.07	3060000	3220000	3140000	113137	4347000	4239000	4293000	76367.5	5722650	5795550	5759100	51548.1	8690000	8730000	8710000	28284.3	12000000	11800000	11900000	141421	22200000	21300000	21750000	636396
5'Blasti3' sg3col2	1000000	1000000	1000000	0	1300000	1306000	1303000	4242.64	2580000	2604000	2592000	16970.6	4820000	4900000	4860000	56568.5	9070000	9250000	9160000	127279	12487500	12366000	12426750	85913.5	1.66941e+07	1.67761e+07	1.67351e+07	57991.6	28400000	31400000	29900000	2.12132e+06	33600000	35000000	34300000	989949	37300000	36800000	37050000	353553
	Day 0				Day 1				Day 2				Day 3				Day 4				Day 5				Day 6				Day 7				Day 8				Day 10
	A	B	Ave	SD	A	B	Ave	SD	A	B	Ave	SD	A	B	Ave	SD	A	B	Ave	SD	A	B	Ave	SD	A	B	Ave	SD	A	B	Ave	SD	A	B	Ave	SD	A	B	Ave	SD
WT	1	1	1	0	1.3	1.31	1.305	0.00707107	2.58	2.6	2.59	0.0141421	4.82	4.9	4.86	0.0565685	9.07	9.25	9.16	0.127279	12.5	12.366	12.433	0.0947523	16.6941	16.7845	16.7393	0.0639578	28.4	31.4	29.9	2.12132	33.6	35	34.3	0.989949	37.3	36.8	37.05	0.353553
Cas9 scrambled	1	1	1	0	1.8	1.89	1.845	0.0636396	4.34	4.76	4.55	0.296985	9.57	9.56	9.565	0.00707107	16.8	17.8	17.3	0.707107	24	23.355	23.6775	0.456084	31.5293	31.9646	31.7469	0.307857	33.7	37.9	35.8	2.96985	35.3	38.2	36.75	2.05061	39.7	44.1	41.9	3.11127
TcMscS KD	1	1	1	0	1.3	1.4	1.35	0.0707107	3.65	2.38	3.015	0.898026	3.51	3.67	3.59	0.113137	5.3	4.7	5	0.424264	6.345	6.75	6.5475	0.286378	9.1125	8.83913	8.97581	0.193305	12	13	12.5	0.707107	13.6	15.8	14.7	1.55563	20.3	24.1	22.2	2.68701
TcMscS KO	1	1	1	0	1.28	1.2	1.24	0.0565685	1.63	1.66	1.645	0.0212132	2.28	2.27	2.275	0.00707107	3.06	3.22	3.14	0.113137	4.347	4.239	4.293	0.0763675	5.72265	5.79555	5.7591	0.0515481	8.69	8.73	8.71	0.0282843	12	11.8	11.9	0.141421	22.2	21.3	21.75	0.636396

## Sheet: Fig 5C stats
WT		Cas 9		TcMscS KD			WT		Cas 9		TcMscS KD			WT		Cas 9		TcMscS KD			WT		Cas 9		TcMscS KD
Mean	37310000	Mean	4.14267e+07	Mean	2.47467e+07		Mean	5.37467e+07	Mean	6.91333e+07	Mean	23150000		Mean	7.15333e+07	Mean	8.62233e+07	Mean	3.37567e+07		Mean	7.49767e+07	Mean	8.61733e+07	Mean	4.78333e+07
Standard Error	1.82779e+06	Standard Error	3.33642e+06	Standard Error	1.92316e+06		Standard Error	2.34281e+06	Standard Error	576667	Standard Error	2.04295e+06		Standard Error	3.9691e+06	Standard Error	1.58787e+06	Standard Error	3.4833e+06		Standard Error	2.40555e+06	Standard Error	2.80474e+06	Standard Error	4.51295e+06
Median	36060000	Median	41670000	Median	25910000		Median	54600000	Median	69710000	Median	22350000		Median	73980000	Median	85510000	Median	35920000		Median	76730000	Median	84870000	Median	44960000
Standard Deviation	3.16583e+06	Standard Deviation	5.77884e+06	Standard Deviation	3.33101e+06		Standard Deviation	4.05786e+06	Standard Deviation	998816	Standard Deviation	3.53849e+06		Standard Deviation	6.87468e+06	Standard Deviation	2.75028e+06	Standard Deviation	6.03326e+06		Standard Deviation	4.16654e+06	Standard Deviation	4.85795e+06	Standard Deviation	7.81666e+06
Sample Variance	10022500000000	Sample Variance	3.3395e+13	Sample Variance	1.10956e+13		Sample Variance	1.64662e+13	Sample Variance	9.97633e+11	Sample Variance	12520900000000		Sample Variance	4.72612e+13	Sample Variance	7.56403e+12	Sample Variance	3.64002e+13		Sample Variance	1.736e+13	Sample Variance	2.35996e+13	Sample Variance	6.11001e+13
Skewness	1.49978	Skewness	-0.189148	Skewness	-1.37991		Skewness	-0.904463	Skewness	-1.73205	Skewness	0.96538		Skewness	-1.39868	Skewness	1.08864	Skewness	-1.4061		Skewness	-1.55832	Skewness	1.1204	Skewness	1.43064
Range	5950000	Range	11550000	Range	6350000		Range	7980000	Range	1730000	Range	6940000		Range	13080000	Range	5360000	Range	11470000		Range	7760000	Range	9450000	Range	14820000
Minimum	34960000	Minimum	35530000	Minimum	20990000		Minimum	49330000	Minimum	67980000	Minimum	20080000		Minimum	63770000	Minimum	83900000	Minimum	26940000		Minimum	70220000	Minimum	82100000	Minimum	41860000
Maximum	40910000	Maximum	47080000	Maximum	27340000		Maximum	57310000	Maximum	69710000	Maximum	27020000		Maximum	76850000	Maximum	89260000	Maximum	38410000		Maximum	77980000	Maximum	91550000	Maximum	56680000
Sum	111930000	Sum	124280000	Sum	74240000		Sum	161240000	Sum	207400000	Sum	69450000		Sum	214600000	Sum	258670000	Sum	101270000		Sum	224930000	Sum	258520000	Sum	143500000
Count	3	Count	3	Count	3		Count	3	Count	3	Count	3		Count	3	Count	3	Count	3		Count	3	Count	3	Count	3
Confidence Level(95.0%)	7.86437e+06	Confidence Level(95.0%)	1.43554e+07	Confidence Level(95.0%)	8.27469e+06		Confidence Level(95.0%)	1.00803e+07	Confidence Level(95.0%)	2.4812e+06	Confidence Level(95.0%)	8.79009e+06		Confidence Level(95.0%)	1.70777e+07	Confidence Level(95.0%)	6.83207e+06	Confidence Level(95.0%)	1.49875e+07		Confidence Level(95.0%)	1.03503e+07	Confidence Level(95.0%)	1.20678e+07	Confidence Level(95.0%)	1.94177e+07
Day 3							Day 4							Day 5
																					Day 6
Day 3
t-Test: Two-Sample Assuming Unequal Variances					t-Test: Two-Sample Assuming Unequal Variances
	WT	Cas 9				WT	TcMscS KD
Mean	37310000	4.14267e+07			Mean	37310000	2.47467e+07
Variance	10022500000000	3.3395e+13			Variance	10022500000000	1.10956e+13
Observations	3	3			Observations	3	3
Hypothesized Mean Difference	0				Hypothesized Mean Difference	0
df	3				df	4
t Stat	-1.08212				t Stat	4.73519
P(T<=t) one-tail	0.179211				P(T<=t) one-tail	0.00453464
t Critical one-tail	2.35336				t Critical one-tail	2.13185
P(T<=t) two-tail	0.358422				P(T<=t) two-tail	0.00906927
t Critical two-tail	3.18245				t Critical two-tail	2.77645
Day 4
t-Test: Two-Sample Assuming Unequal Variances					t-Test: Two-Sample Assuming Unequal Variances
	WT	Cas 9				WT	TcMscS KD
Mean	5.37467e+07	6.91333e+07			Mean	5.37467e+07	23150000
Variance	1.64662e+13	9.97633e+11			Variance	1.64662e+13	12520900000000
Observations	3	3			Observations	3	3
Hypothesized Mean Difference	0				Hypothesized Mean Difference	0
df	2				df	4
t Stat	-6.37727				t Stat	9.8431
P(T<=t) one-tail	0.0118586				P(T<=t) one-tail	0.000298734
t Critical one-tail	2.91999				t Critical one-tail	2.13185
P(T<=t) two-tail	0.0237171				P(T<=t) two-tail	0.000597469
t Critical two-tail	4.30265				t Critical two-tail	2.77645
Day 5
t-Test: Two-Sample Assuming Unequal Variances					t-Test: Two-Sample Assuming Unequal Variances
	WT	Cas 9				WT	TcMscS KD
Mean	7.15333e+07	8.62233e+07			Mean	7.15333e+07	3.37567e+07
Variance	4.72612e+13	7.56403e+12			Variance	4.72612e+13	3.64002e+13
Observations	3	3			Observations	3	3
Hypothesized Mean Difference	0				Hypothesized Mean Difference	0
df	3				df	4
t Stat	-3.43631				t Stat	7.15355
P(T<=t) one-tail	0.0206736				P(T<=t) one-tail	0.00101035
t Critical one-tail	2.35336				t Critical one-tail	2.13185
P(T<=t) two-tail	0.0413472				P(T<=t) two-tail	0.00202071
t Critical two-tail	3.18245				t Critical two-tail	2.77645
Day 6
t-Test: Two-Sample Assuming Unequal Variances					t-Test: Two-Sample Assuming Unequal Variances					t-Test: Two-Sample Assuming Unequal Variances
	WT	Cas 9				WT	TcMscS KD				Cas 9	TcMscS KD
Mean	7.49767e+07	8.61733e+07			Mean	7.49767e+07	4.78333e+07			Mean	8.61733e+07	4.78333e+07
Variance	1.736e+13	2.35996e+13			Variance	1.736e+13	6.11001e+13			Variance	2.35996e+13	6.11001e+13
Observations	3	3			Observations	3	3			Observations	3	3
Hypothesized Mean Difference	0				Hypothesized Mean Difference	0				Hypothesized Mean Difference	0
df	4				df	3				df	3
t Stat	-3.0302				t Stat	5.30761				t Stat	7.21559
P(T<=t) one-tail	0.0193865				P(T<=t) one-tail	0.00652908				P(T<=t) one-tail	0.00274399
t Critical one-tail	2.13185				t Critical one-tail	2.35336				t Critical one-tail	2.35336
P(T<=t) two-tail	0.038773				P(T<=t) two-tail	0.0130582				P(T<=t) two-tail	0.00548799
t Critical two-tail	2.77645				t Critical two-tail	3.18245				t Critical two-tail	3.18245

## Sheet: Fig 5D
Figure 5 D and Supplement 1 C
	WT	Cas9	TcMcS KD	TcMcS KO			WT	Cas9	TcMcS KD	TcMcS KO			WT	Cas9	TcMcS KD	TcMcS KO
Exp 1.1	1	0.9504	0.8389	0.00419		Exp 1	1	1.05555	0.98133	0.00309702		Exp 1	1	1.05555	0.98133	0.00309702
Exp 1.2	1	2.8481	2.21914	0.00333061		Exp 2	1	0.104627	0.101063	0.0152681		Exp 3	1	1.31	1.24	0.000153457
Exp 1.3	1	1.1607	1.12376	0.00177045		Exp 3	1	2.31	1.24	0.000153457		Exp 4	1	1.79834	1.39152	1.13522e-05
						Exp 4	1	1.79834	1.39152	1.13522e-05
Average	1	1.65307	1.39393	0.00309702		Average	1	1.31713	0.92848	0.00463249		Average	1	1.38796	1.20428	0.00108728
SD	0	1.04026	0.728704	0.00122657		SD	0	0.958461	0.577023	0.00723167		SD	0	0.377482	0.207417	0.00174194
Epis WT		Epis Cas9		Epis KD		Epis KO
Mean	1	Mean	1.38796	Mean	1.20428	Mean	0.000686786
Standard Error	0	Standard Error	0.217939	Standard Error	0.119752	Standard Error	0.000603349
Median	1	Median	1.31	Median	1.24	Median	0.000153
Standard Deviation	0	Standard Deviation	0.377482	Standard Deviation	0.207417	Standard Deviation	0.00134913
Sample Variance	0	Sample Variance	0.142493	Sample Variance	0.0430217	Sample Variance	1.82015e-06
Range	0	Range	0.742789	Range	0.410195	Range	0.00308567
Minimum	1	Minimum	1.05555	Minimum	0.98133	Minimum	1.13522e-05
Maximum	1	Maximum	1.79834	Maximum	1.39152	Maximum	0.00309702
Sum	3	Sum	4.16389	Sum	3.61285	Sum	0.00343393
Count	3	Count	3	Count	3	Count	5
Confidence Level(95.0%)	0	Confidence Level(95.0%)	0.937718	Confidence Level(95.0%)	0.515252	Confidence Level(95.0%)	0.00167517
Anova: Single Factor
SUMMARY
Groups	Count	Sum	Average	Variance
Epis WT	3	3	1	0
Epis Cas9	3	4.16389	1.38796	0.142493
Epis KD	3	3.61285	1.20428	0.0430217
Epis KO	5	0.00343393	0.000686786	1.82015e-06
ANOVA
Source of Variation	SS	df	MS	F	P-value	F crit
Between Groups	4.82936	3	1.60979	43.3863	4.85371e-06	3.70826
Within Groups	0.371036	10	0.0371036
Total	5.2004	13
t-Test: Two-Sample Assuming Equal Variances				t-Test: Two-Sample Assuming Equal Variances				t-Test: Two-Sample Assuming Equal Variances				t-Test: Two-Sample Assuming Equal Variances				t-Test: Two-Sample Assuming Unequal Variances
	Epis WT	Epis Cas9			Epis WT	Epis KD			Epis WT	Epis KO			Epis Cas9	Epis KO			Epis Cas9	Epis KD
Mean	1	1.38796		Mean	1	1.20428		Mean	1	0.000686786		Mean	1.38796	0.000686786		Mean	1.38796	0.640431
Variance	0	0.142493		Variance	0	0.0430217		Variance	0	1.82015e-06		Variance	0.142493	1.82015e-06		Variance	0.142493	0.22326
Observations	3	3		Observations	3	3		Observations	3	5		Observations	3	5		Observations	3	3
Pooled Variance	0.0712464			Pooled Variance	0.0215108			Pooled Variance	1.21343e-06			Pooled Variance	0.0474988			Hypothesized Mean Difference	0
Hypothesized Mean Difference	0			Hypothesized Mean Difference	0			Hypothesized Mean Difference	0			Hypothesized Mean Difference	0			df	4
df	4			df	4			df	6			df	6			t Stat	2.14091
t Stat	-1.78015			t Stat	-1.7059			t Stat	1242.21			t Stat	8.71611			P(T<=t) one-tail	0.0494935
P(T<=t) one-tail	0.0748292			P(T<=t) one-tail	0.0816115			P(T<=t) one-tail	9.18553e-18			P(T<=t) one-tail	6.30372e-05			t Critical one-tail	2.13185
t Critical one-tail	2.13185			t Critical one-tail	2.13185			t Critical one-tail	1.94318			t Critical one-tail	1.94318			P(T<=t) two-tail	0.098987
P(T<=t) two-tail	0.149658			P(T<=t) two-tail	0.163223			P(T<=t) two-tail	1.83711e-17			P(T<=t) two-tail	0.000126074			t Critical two-tail	2.77645
t Critical two-tail	2.77645			t Critical two-tail	2.77645			t Critical two-tail	2.44691			t Critical two-tail	2.44691
