# Supplementary material for: A novel mechanosensitive channel controls osmoregulation, differentiation, and infectivity in Trypanosoma cruzi
Source: eLife. 2021 Jul 2;10:e67449. doi: 10.7554/eLife.67449 (PMC8282336; doi:10.7554/eLife.67449)
Supplement: Figure 6—figure supplement 2—source data 1. [file elife-67449-fig6-figsupp2-data1.xlsx]

## Sheet: Fig 6 Suppl 2
Summary normalized against WT
Exp	WT	Cas9	TcMscS KD	TcMscS KO
1	1.00107	1.25228	1.21446	1.30109
2	1.00028	1.17543	1.30394	1.45552
3	1.00003	1.0645	1.43753	1.23467
4	1.00005	1.10901	1.29738	1.23467
5	1.00009	1.08219	1.41933	1.46721
6	1.00101	1.17651	1.45196	1.51357
7	1.00101	1.17651	1.45196	1.51357
Average	1.00051	1.14806	1.36808	1.38862
SD	0.000496938	0.065926	0.0950719	0.127111
SE	0.000187825	0.0249177	0.0359338	0.0480435
ANOVA summary
F	32.72
P value	<0.0001
P value summary	****
Significant diff. among means (P < 0.05)?	Yes
R squared	0.8035
ANOVA table	SS	DF	MS	F (DFn, DFd)	P value
Treatment (between columns)	0.7249	3	0.2416	F (3, 24) = 32.72	P<0.0001
Residual (within columns)	0.1773	24	0.007386
Total	0.9021	27
Number of families	1
Number of comparisons per family	3
Alpha	0.05
Dunnett's multiple comparisons test	Mean Diff.	95.00% CI of diff.	Below threshold?	Summary	Adjusted P Value	A-?
WT vs. Cas9	-0.1476	-0.2627 to -0.03240	Yes	*	0.0102	B	Cas9
WT vs. TcMscS KD	-0.3676	-0.4827 to -0.2524	Yes	****	<0.0001	C	TcMscS KD
WT vs. TcMscS KO	-0.3881	-0.5033 to -0.2730	Yes	****	<0.0001	D	TcMscS KO
Test details	Mean 1	Mean 2	Mean Diff.	SE of diff.	n1	n2	q	DF
WT vs. Cas9	1.001	1.148	-0.1476	0.04594	7	7	3.212	24
WT vs. TcMscS KD	1.001	1.368	-0.3676	0.04594	7	7	8.002	24
WT vs. TcMscS KO	1.001	1.389	-0.3881	0.04594	7	7	8.449	24
