# Supplementary material for: A novel mechanosensitive channel controls osmoregulation, differentiation, and infectivity in Trypanosoma cruzi
Source: eLife. 2021 Jul 2;10:e67449. doi: 10.7554/eLife.67449 (PMC8282336; doi:10.7554/eLife.67449)
Supplement: Figure 6—source data 1. [file elife-67449-fig6-data1.xlsx]

## Sheet: Fig 6 A-D
Average
	Exp1			Exp 2						Exp1			Exp2						Exp1			Exp2						Exp 1			Exp2							Exp1			Exp2						Exp1
Time	Iso N WT1	Iso N WT2	Iso N WT3	Iso N WT1	Iso N WT2	Iso N WT3	Average Iso WT	SD WT Iso	SE WT Iso	Iso N cas9-1	Iso N cas9-2	Iso N cas9-3	Iso N cas9-1	Iso N cas9-2	Iso N cas9-3	Average Iso Cas9	SD Iso Cas9	SE Iso Cas9	Iso N TcMcSKD-1	Iso N TcMcSKD-2	Iso N TcMcSKD-3	Iso N TcMcSKD-1	Iso N TcMcSKD-2	Iso N TcMcSKD-3	Average Iso KD	SD Iso KD	SE Iso KD	Iso N TcMcSKO-1	Iso N TcMcSKO-2	Iso N TcMcSKO-3	Iso N TcMcSKO-1	Iso N TcMcSKO-2	Iso N TcMcSKO-3	Average Iso KO	SD Iso KO	SE Iso KO		Water N WT1	Water N WT2	Water N WT3	Water N WT1	Water N WT2	Water N WT3	Average Water ET	SD Water WT	SE Water WT	Water N cas9-1	Water N cas9-2	Water N cas9-3
0	-0.367119	-0.635324	0.240795	0.298414	-0.11141	-0.112931	-0.0732616	0.324504	0.132478	0.187421	-0.233121	-0.386392	0.540797	1.01816	0.272537	0.233234	0.468291	0.191179	-1.88075	-2.51067	-2.06581	-1.89739	-2.3423	-1.65878	-2.05928	0.28936	0.118131	-2.84204	-3.06348	-2.56649	-2.86942	-1.88825	-2.61985	-2.64159	0.374992	0.15309		0.956098	0.366511	0.268286	0.160805	0.14968	0.296494	0.366312	0.274315	0.111989	1.5542	0.923927	0.412038
14	-1.27009	-0.818862	-0.586791	-0.430344	-0.621873	-0.403323	-0.681409	0.293826	0.119954	-1.03299	-0.866505	-0.78731	-0.110194	0.125156	-0.398323	-0.511695	0.418976	0.171046	-2.63867	-2.88809	-2.518	-2.36096	-2.6453	-2.11316	-2.52736	0.243503	0.0994096	-3.63476	-4.35243	-3.70262	-5.87694	-3.8921	-3.81443	-4.21221	0.779402	0.318189		-0.317073	-0.538987	-0.677775	-0.594281	-0.655094	-0.680193	-0.577234	0.126628	0.0516958	0.355635	-0.336758	-0.653728
28	-1.77631	-1.18594	-0.993571	-0.844982	-0.974335	-0.754215	-1.08746	0.335576	0.136998	-1.1376	-0.884099	-0.630429	-0.61878	0.0236782	-0.922432	-0.694944	0.367391	0.149987	-2.6892	-2.78963	-2.69565	-2.28965	-2.37795	-1.62383	-2.41098	0.39523	0.161352	-3.93423	-3.92867	-3.92985	-4.4857	-3.79576	-3.53001	-3.93404	0.284823	0.116278		-0.946341	-0.7977	-1.25671	-0.917889	-1.21494	-1.37783	-1.08523	0.208889	0.0852785	-0.951891	-1.32113	-0.199467
42	-1.8584	-1.52478	-1.49854	-1.03345	-1.04726	-0.766314	-1.17636	0.369831	0.150983	-1.29451	-0.479437	-0.543273	-0.944276	-0.767852	-0.33543	-0.727463	0.321278	0.131161	-3.09342	-2.93732	-2.84099	-2.5036	-1.62936	-2.16559	-2.52838	0.504099	0.205797	-3.30006	-3.52256	-3.35305	-4.85397	-3.79576	-3.81443	-3.7733	0.521774	0.213013		-1.56098	-1.34387	-2.04744	-1.40929	-1.0983	-1.61037	-1.51171	0.291186	0.118876	-1.73277	-1.14843	-1.42248
56	-1.8584	-1.313	-1.75102	-0.857547	-0.451719	-0.681617	-0.96232	0.529481	0.21616	-1.81755	-0.989664	-0.0551989	-0.740841	-0.950512	-0.607966	-0.860288	0.527151	0.215208	-3.11026	-3.085	-2.88944	-3.3416	-2.19971	-2.49763	-2.85394	0.390115	0.159264	-3.05344	-3.46959	-2.95103	-5.57005	-4.47013	-4.97108	-4.08089	0.988896	0.403715		-1.73659	-1.97628	-2.40045	-1.58908	-1.49486	-1.54061	-1.78964	0.316196	0.129087	-2.09598	-1.32113	-1.56225
70	-1.489	-1.29888	-2.01753	-1.1591	-0.536796	-0.621118	-0.951503	0.506174	0.206645	-1.55603	-0.0571806	0.711775	-1.37149	-1.80293	-1.09015	-0.861	0.894721	0.365268	-3.34606	-3.5937	-3.26088	-3.85867	-2.27101	-3.09182	-3.23702	0.496721	0.202786	-3.38814	-3.69913	-3.75506	-6.14291	-5.10597	-5.67266	-4.62731	1.06276	0.433872		-2.36585	-2.45059	-2.45693	-1.88871	-1.82143	-1.73827	-2.1203	0.308656	0.126008	-2.2231	-1.32113	-1.49236
84	-1.3385	-1.62361	-1.93337	-1.44809	-0.70695	-0.427523	-0.980267	0.520407	0.212455	-1.03299	-0.268309	0.171407	-0.700154	-1.33613	-0.628931	-0.632519	0.489725	0.199929	-3.4808	-3.52806	-3.27703	-3.64471	-2.36012	-2.95201	-3.20712	0.439082	0.179255	-3.91662	-3.80507	-4.17456	-6.47026	-4.64355	-5.93812	-4.82469	1.02204	0.417244		-3.00976	-3.19799	-2.08981	-1.62503	-1.23826	-1.61037	-2.12854	0.734435	0.299832	-2.11414	-1.49383	-1.59719
98	-1.51636	-1.28477	-1.91935	-1.56117	-0.634027	-0.596919	-1.07712	0.486984	0.19881	-0.300745	-0.585001	-0.909329	-0.659467	-1.82322	-0.607966	-0.814289	0.484738	0.197893	-3.43027	-3.11782	-3.22858	-3.6982	-2.21754	-3.07435	-3.12779	0.457992	0.186975	-4.14563	-3.99929	-4.15708	-6.28612	-4.72062	-5.72955	-4.83971	0.871028	0.355596		-3.50732	-3.22673	-2.31573	-2.20034	-1.80977	-1.68013	-2.45667	0.683607	0.279082	-1.76909	-1.23478	-1.05557
112	-1.489	-0.649442	-1.83518	-1.66169	-0.682642	-0.596919	-1.10756	0.519787	0.212202	0.0479449	-0.760941	-0.386392	-1.08668	-2.71623	-0.943396	-0.974283	0.86449	0.352927	-3.63238	-3.05218	-3.39008	-3.66254	-2.59183	-3.33649	-3.27758	0.367711	0.150117	-4.26894	-4.10524	-4.24447	-5.93832	-4.72062	-5.88124	-4.8598	0.76627	0.312828		-4.01951	-3.71542	-2.48517	-2.04453	-1.63482	-1.73827	-2.60629	0.935843	0.382056	-1.22429	-1.26932	0.080078
126	-5.45662	-13.3842	-4.75278	-5.94629	-6.60158	-7.45745	-6.36548	2.86478	1.16954	3.70919	-3.08335	-1.18823	-3.8127	-6.55211	-7.52621	-3.07557	3.69759	1.50953	4.1152	2.24811	-1.08068	-7.42463	-1.78977	-9.08614	-2.16965	4.75743	1.94221	-15.0323	7.8485	-13.8229	-4.01514	-9.86513	-12.8022	-7.9482	7.92609	3.23581		12.8829	13.7046	10.0678	11.4631	9.8303	13.6213	11.9283	1.5818	0.645766	14.4115	15.8622	15.4376
140	-7.02999	-12.5653	-7.6844	-10.7712	-11.3051	-11.8012	-10.2269	2.08499	0.851193	-0.544828	-1.88696	-1.62401	-5.17572	-7.0392	-8.44864	-4.11989	2.95442	1.20614	-7.6746	-1.87069	-8.59027	-10.6875	-11.4144	-12.9658	-8.86722	3.58355	1.46298	-15.3494	0.503222	-14.8717	-10.0302	-17.9191	-16.86	-12.4212	6.28843	2.56724		16.3512	15.6306	14.5722	15.6221	13.6909	15.4351	15.217	0.857719	0.350162	18.5157	19.0225	19.1765
154	-8.83594	-13.13	-8.86265	-13.6108	-12.7879	-12.8418	-12.0191	2.018	0.823845	-1.81755	-1.30636	-1.41483	-5.78602	-7.38423	-8.21803	-4.32117	2.90166	1.1846	-18.2517	-12.5697	-11.6587	-15.1806	-15.0148	-14.5387	-14.5357	2.10541	0.85953	-12.5132	-9.79077	-16.3224	-15.5747	-19.9807	-17.1254	-15.2179	3.27718	1.3379		18.3561	16.5361	16.4643	15.9936	14.0408	15.7491	16.19	1.27404	0.520125	20.2954	20.9049	20.2772
168	-8.24763	-12.7347	-8.73641	-14.5532	-13.7116	-13.5194	-12.5079	2.48283	1.01361	-1.73038	-1.35914	-1.06621	-6.4777	-8.23665	-8.99371	-4.64396	3.34837	1.36697	-21.536	-20.7909	-13.4513	-17.1241	-16.5832	-16.0766	-17.5937	2.78289	1.13611	-11.7557	-17.0301	-17.6333	-20.8327	-21.2139	-17.9977	-17.7439	3.10982	1.26958		17.039	16.4642	17.961	14.3037	13.5159	15.1212	15.7342	1.55655	0.63546	19.7143	20.8531	20.0151
182	-8.45286	-11.8311	-9.49386	-14.8547	-14.0762	-13.9429	-12.8317	2.41715	0.986796	-1.60833	-1.28876	-0.456117	-6.70148	-8.60197	-10.0839	-4.79009	3.81606	1.5579	-22.0582	-23.9908	-15.8253	-17.5698	-17.92	-17.5096	-19.1456	2.87648	1.17432	-11.65	-18.7605	-18.0179	-22.4694	-21.3102	-18.1683	-18.3961	3.43805	1.40358		17.2439	16.0618	16.436	13.189	13.1194	14.4468	15.0828	1.59718	0.652045	18.9697	20.3005	18.8096
196	-8.84962	-11.6194	-9.85856	-14.9427	-13.8088	-13.9792	-12.8951	2.24786	0.917685	-0.85865	0.101166	-0.35153	-6.90491	-9.00788	-9.72746	-4.45821	4.1845	1.70832	-22.3613	-24.8277	-17.2142	-18.1582	-19.7023	-19.3971	-20.2768	2.58289	1.05446	-12.249	-19.555	-18.8394	-23.0832	-21.58	-19.4956	-19.1337	3.40043	1.38822		15.7512	15.1563	14.784	12.2422	11.7781	13.412	13.854	1.48677	0.606973	17.6077	19.6097	18.1632
210	-9.72523	-12.0429	-9.91467	-14.7165	-13.6994	-14.1244	-13.0664	1.97829	0.807634	-1.6432	0.435452	-0.857035	-6.53873	-8.74404	-9.22432	-4.42865	3.87832	1.58332	-23.0182	-25.4513	-18.1832	-18.9427	-21.0035	-20.568	-21.1945	2.44996	1.00019	-15.1908	-20.7027	-19.4861	-24.0653	-21.657	-20.8988	-20.3335	2.68635	1.0967		14.1415	13.9202	14.4451	11.0556	11.4049	12.726	12.9489	1.33057	0.543202	16.5363	18.5217	16.3985
224	-9.68419	-12.2547	-9.78843	-14.4652	-13.6387	-14.0397	-12.9569	1.94329	0.793347	-1.27708	0.47064	-0.92676	-5.56224	-8.66286	-8.11321	-4.01192	3.60431	1.47145	-23.2203	-25.0082	-18.5223	-20.0303	-21.6808	-21.2845	-21.6244	2.09284	0.854398	-16.0012	-20.9676	-20.4125	-24.8223	-22.5241	-21.752	-21.0799	2.67065	1.09029		12.8976	13.3884	13.259	9.95296	11.02	12.1795	12.1162	1.25302	0.511544	15.029	17.192	14.9833
238	-9.77996	-12.89	-9.71829	-14.4526	-13.347	-13.7977	-12.8443	1.88553	0.769764	0.0653794	0.365076	-1.13593	-4.78919	-7.70896	-7.48428	-3.44798	3.37824	1.37916	-24.113	-24.9918	-19.0875	-20.5474	-21.9481	-21.5641	-22.042	2.0079	0.819723	-18.0446	-20.5615	-21.3738	-25.7634	-23.3526	-22.3019	-21.8996	2.38501	0.973677		11.9024	12.3679	12.6094	9.13794	10.0636	11.2028	11.214	1.25076	0.510621	14.5387	16.0003	13.9525
252	-9.75259	-12.89	-9.57802	-14.0883	-12.642	-13.6041	-12.5218	1.77969	0.726556	1.56475	-0.585001	-1.90291	-4.17889	-7.38423	-6.6457	-3.18866	3.20316	1.30769	-23.9951	-24.7621	-19.2167	-21.8668	-22.162	-21.6515	-22.2757	1.78256	0.727728	-18.7317	-20.7734	-22.5799	-26.9705	-24.1233	-22.5864	-22.6275	2.57288	1.05038		10.7463	11.5631	12.1152	8.40683	8.85057	10.4238	10.351	1.34004	0.547069	13.4491	14.7397	12.5897
266	-10.3135	-12.7771	-10.069	-13.9752	-12.3017	-13.5557	-12.5365	1.49585	0.610679	1.52988	-1.25357	-2.16438	-4.66713	-6.79566	-5.95388	-3.21746	2.88375	1.17729	-23.4224	-24.5487	-19.2975	-22.6691	-22.2867	-21.7389	-22.3272	1.62165	0.662037	-18.9959	-20.897	-23.0343	-28.0139	-25.0482	-22.8897	-23.1465	2.87734	1.17467		10.1317	10.7869	10.802	7.74763	8.32572	9.73781	9.58864	1.16973	0.477542	11.7965	13.8762	11.821
280	-10.5735	-13.5677	-10.2513	-14.2893	-11.3537	-13.4105	-12.4068	1.57322	0.642264	1.37297	-1.79899	-2.47814	-5.27743	-7.18127	-6.39413	-3.62617	2.96297	1.20963	-23.7256	-24.1385	-19.3621	-22.7048	-22.1976	-21.0573	-22.1976	1.61758	0.660375	-19.5596	-21.3914	-23.2965	-28.4026	-24.7784	-23.0414	-23.4117	2.7643	1.12852		9.22439	9.99641	9.91245	6.95658	7.54427	9.06343	8.78292	1.14686	0.468204	10.725	13.4272	10.4582
294	-11.408	-13.9207	-11.0508	-14.0506	-11.451	-13.1927	-12.5256	1.24461	0.50811	1.61705	-2.50275	-3.29741	-5.41984	-7.83073	-6.16352	-3.93287	3.04497	1.2431	-23.8603	-24.04	-19.3944	-22.5087	-22.3224	-21.0049	-22.1884	1.60995	0.657259	-20.1938	-21.1442	-23.6461	-28.996	-25.2601	-23.2879	-23.7547	2.87117	1.17215		8.2878	9.40711	9.36176	6.39326	6.93778	8.50532	8.14884	1.13648	0.463967	9.32671	12.201	9.51473
308	-11.6133	-13.3983	-10.8966	-13.7867	-12.3747	-13.3742	-12.7872	1.04618	0.427103	2.99438	-2.88982	-2.93135	-6.33529	-8.52079	-5.87002	-3.92548	3.6663	1.49676	-24.113	-24.0893	-19.3621	-22.2412	-22.1976	-20.9874	-22.1651	1.67069	0.682057	-20.7927	-21.3737	-23.8908	-29.712	-25.6069	-22.6053	-23.9969	3.00972	1.22871		7.65854	9.17715	8.66987	5.82995	6.6112	8.05186	7.66643	1.1492	0.469159	8.12815	11.2339	8.32666
322	-11.4628	-13.0171	-10.7423	-13.3721	-12.3504	-12.8055	-12.4977	0.917309	0.37449	3.43024	-2.6435	-3.10566	-6.55907	-8.07428	-7.33753	-4.0483	3.91838	1.59967	-23.6919	-23.8431	-19.4428	-22.2234	-22.0016	-20.935	-22.023	1.52642	0.623157	-20.5109	-21.0029	-23.6985	-29.9166	-25.4528	-22.3019	-23.8139	3.18957	1.30214		7.05854	8.44413	8.02033	5.31457	5.99304	7.56351	7.06569	1.10123	0.449577	7.87391	10.5259	7.71516
336	-11.2712	-12.6218	-10.2092	-12.7564	-11.1471	-10.2162	-11.3477	1.01875	0.415904	3.7615	-3.31207	-3.0708	-6.98629	-8.54108	-7.35849	-4.25121	4.12346	1.6834	-23.8435	-23.7775	-19.6851	-21.9381	-21.6273	-20.8126	-21.9473	1.49737	0.611297	-20.2466	-21.3561	-24.0132	-29.3028	-25.106	-22.283	-23.7179	2.96908	1.21212		6.3561	7.79734	7.42728	4.82316	5.07163	7.43561	6.48519	1.17542	0.479865	7.09303	9.78327	7.10365
350	-10.4914	-12.3535	-9.07306	-12.0653	-8.24235	-8.34073	-9.78495	1.66805	0.68098	4.99935	-3.29448	-2.93135	-6.68113	-8.96729	-8.25996	-4.18914	4.69793	1.91792	-23.5403	-23.6626	-19.7174	-22.2769	-21.4847	-20.6728	-21.8925	1.43651	0.586453	-20	-21.0029	-24.3278	-29.0983	-25.0482	-21.4297	-23.4845	3.08741	1.26043		5.91707	7.49551	6.94719	4.49956	4.92001	6.91239	6.11529	1.10386	0.450648	6.2395	8.43623	6.00294
364	-10.2862	-12.4665	-7.8948	-11.8266	-8.06004	-8.95781	-9.78266	1.76731	0.721501	5.3306	-2.6611	-3.82034	-6.27426	-9.55586	-8.19706	-4.19634	4.87013	1.98822	-23.3719	-24.0893	-19.6851	-22.4373	-21.253	-20.6728	-21.9182	1.53169	0.625311	-20.1938	-20.3496	-23.4888	-29.3438	-24.7592	-20.5195	-23.1091	3.28018	1.33913		5.72683	6.61876	6.5377	4.24786	4.57011	7.06354	5.79413	1.05972	0.432629	5.98526	7.53821	5.8457
378	-10.2862	-12.0712	-6.16949	-11.7387	-9.89527	-9.93789	-10.4645	1.91835	0.783165	6.20233	-2.55553	-3.27997	-6.25392	-8.94699	-8.42767	-3.87696	5.09508	2.08006	-23.4561	-24.1877	-19.8143	-22.4017	-20.8609	-20.6029	-21.8873	1.5821	0.64589	-20.2995	-19.9258	-23.6985	-29.2824	-23.5838	-19.0026	-22.6321	3.46909	1.41625		5.55122	6.63313	6.4671	3.92425	4.52345	7.13331	5.70541	1.15996	0.473552	5.45862	7.71091	5.33902
392	-10.5324	-12.65	-4.7668	-10.5953	-11.767	-11.0995	-10.9985	2.55101	1.04145	6.49871	-2.32681	-3.19282	-6.43701	-8.66286	-7.79874	-3.65325	5.08371	2.07541	-22.9677	-23.8595	-19.5236	-22.7048	-21.2708	-20.7078	-21.839	1.4759	0.602533	-20.3523	-19.3961	-23.4713	-29.753	-23.4875	-17.6753	-22.3559	3.91415	1.59795		5.2439	6.17319	6.15645	4.03212	4.73339	6.92402	5.54385	0.975393	0.398202	4.76853	6.3466	4.81487
406	-10.6693	-12.7206	-5.51023	-9.13774	-11.9614	-8.93361	-10.1755	2.36452	0.965311	8.2596	-2.6435	-2.68731	-6.9456	-8.50049	-7.14885	-3.27769	5.62104	2.29478	-22.9003	-23.7775	-19.6205	-22.259	-21.2173	-20.5855	-21.7267	1.4062	0.574081	-21.057	-18.9724	-23.4888	-29.2415	-22.2736	-17.0875	-22.0201	3.8496	1.57159		4.86341	5.62702	5.66224	3.69653	4.97833	6.51706	5.2241	0.870828	0.355514	4.16925	6.48476	3.59186
420	-11.025	-13.3418	-6.15546	-8.79849	-9.9682	-7.08236	-9.2185	2.40698	0.982646	9.37541	-2.62591	-2.39098	-6.25392	-8.21635	-7.0021	-2.85231	5.87857	2.39992	-22.4287	-23.3508	-19.5397	-22.2055	-21.253	-20.6379	-21.5693	1.25193	0.511099	-20.9513	-18.9194	-23.4014	-29.5893	-22.3699	-16.6324	-21.9773	4.06398	1.65911		4.48293	5.45455	5.93053	3.45682	5.38654	6.52869	5.20668	0.995933	0.406588	3.95133	5.86305	2.99783
434	-10.9839	-13.8783	-6.77265	-8.52207	-8.01142	-8.95781	-9.11881	2.31925	0.94683	9.30567	-1.90455	-1.97263	-6.17255	-7.9931	-7.37945	-2.6861	5.87749	2.39948	-22.3108	-22.9242	-19.5397	-22.2055	-21.2352	-20.4981	-21.4523	1.16092	0.473945	-21.2507	-19.1313	-23.6811	-31.0828	-22.1195	-15.6085	-22.1456	4.74083	1.93543		4.17561	4.98024	5.90229	3.14519	5.4332	6.85425	5.0818	1.19165	0.48649	3.40653	5.43131	2.84059
448	-11.1755	-14.203	-8.23144	-8.25821	-8.07219	-10.8454	-9.58781	2.21874	0.905798	8.57342	-2.11568	-2.25153	-5.46053	-7.60748	-7.67296	-2.75579	5.53847	2.26107	-22.294	-22.6124	-19.459	-21.9916	-20.9856	-20.7777	-21.3534	1.07491	0.438828	-21.515	-18.9547	-23.6461	-31.0214	-21.58	-15.0207	-21.9563	4.87306	1.98942		3.66341	4.6784	5.26687	3.10924	4.78005	6.86588	4.72731	1.1986	0.489325	3.11597	4.70598	2.22908
462	-10.6693	-14.1042	-9.69024	-7.78074	-9.9682	-10.4098	-9.70699	1.88574	0.76985	8.45138	-0.848911	-2.63502	-5.03331	-8.07428	-7.02306	-2.5272	5.48667	2.23992	-22.3782	-22.8257	-19.5882	-21.849	-20.7005	-20.7078	-21.3415	1.11219	0.454049	-22.2196	-19.3785	-23.6112	-30.8987	-21.58	-15.2862	-22.1623	4.72223	1.92784		3.67805	4.1466	5.50692	2.60585	4.72173	5.86594	4.42085	1.10148	0.449678	2.80725	4.39513	2.21161
476	-10.2588	-13.963	-10.4477	-7.45406	-11.4874	-8.83682	-9.50928	2.04212	0.833691	8.74777	-1.69342	-1.36254	-4.95194	-7.74955	-6.66667	-2.27939	5.46345	2.23044	-22.4792	-23.0062	-19.7335	-21.4389	-20.2371	-20.8301	-21.2875	1.16366	0.475063	-22.431	-20.226	-23.716	-30.8168	-21.5222	-15.1155	-22.3046	4.67408	1.90818		2.91707	3.74416	5.32335	2.36614	4.15022	5.74967	4.04177	1.2064	0.49251	2.22612	4.13608	1.65252
490	-9.4516	-14.2454	-10.588	-7.12738	-11.6454	-6.50157	-8.6815	2.64057	1.07801	9.63693	-1.85177	-1.4497	-4.15854	-8.03369	-6.43606	-2.04881	5.72235	2.33614	-22.4624	-22.6945	-19.5236	-21.2427	-20.344	-20.8126	-21.18	1.11949	0.457031	-22.1668	-20.8087	-23.6985	-30.9601	-20.9441	-15.6085	-22.3644	4.57864	1.86922		2.39024	3.60043	4.60322	2.46202	3.59038	5.71478	3.72685	1.16482	0.475535	1.77212	3.99793	1.12837
504	-8.7128	-13.7654	-11.1911	-6.67504	-10.9162	-7.13076	-8.3587	2.48158	1.0131	10.3517	-1.00726	-1.1185	-3.71099	-7.26246	-6.22642	-1.49565	5.79203	2.36458	-22.9677	-22.4811	-19.3298	-20.7792	-20.6113	-20.7427	-21.152	1.22355	0.499513	-21.9378	-21.1089	-23.2266	-30.7555	-20.3661	-15.7033	-22.183	4.49217	1.83392		1.98049	3.47107	4.4479	2.0665	3.60204	5.92407	3.58201	1.36072	0.555512	1.35444	3.32441	0.953657
518	-8.65808	-13.6948	-11.4576	-7.05199	-9.34835	-8.67952	-8.43448	2.16912	0.885541	10.683	-0.936881	-1.55428	-3.03965	-6.77536	-6.12159	-1.2908	5.77411	2.35727	-23.2035	-22.3499	-19.572	-20.1195	-20.2905	-20.533	-21.0114	1.30463	0.532614	-21.6911	-21.0206	-23.4713	-29.9575	-20.289	-15.5895	-22.0032	4.29269	1.75249		1.74634	3.28423	4.19373	1.86275	4.1269	5.72641	3.49006	1.39242	0.568454	1.48156	3.39349	0.918714
532	-8.90434	-13.483	-11.3033	-6.71274	-7.98712	-9.3813	-8.24638	2.21523	0.904364	11.3629	-0.585001	-1.31025	-3.2024	-6.87684	-6.22642	-1.13966	6.05113	2.47036	-23.2203	-22.2186	-19.3944	-19.7629	-20.6826	-20.533	-20.9686	1.34388	0.548636	-21.1979	-20.5085	-23.6112	-29.7325	-20.4624	-15.4947	-21.8345	4.27733	1.74621		1.52683	3.11175	4.08077	1.99459	3.97527	5.40085	3.34834	1.31332	0.53616	1.02756	3.20352	1.18079
546	-9.68419	-13.3559	-11.0649	-6.18502	-7.59819	-9.5386	-8.2515	2.3068	0.941748	10.3169	-0.585001	-0.543273	-2.93794	-5.63881	-6.0587	-0.907807	5.46605	2.2315	-22.8329	-22.317	-19.1844	-19.4419	-20.9678	-20.533	-20.8795	1.35093	0.551514	-21.1803	-19.5374	-23.4364	-29.8962	-20.8478	-14.9259	-21.6373	4.50426	1.83886		1.46829	2.65181	3.78424	1.62304	3.36878	5.0404	2.98943	1.24345	0.507636	0.718837	3.23806	0.971128
560	-9.76628	-13.0736	-11.0649	-6.0845	-8.53404	-8.92151	-8.32658	2.16758	0.884911	10.5784	-0.602595	-0.456117	-2.75484	-5.43585	-5.1153	-0.631053	5.37569	2.19462	-22.4624	-22.1858	-18.9906	-19.3171	-20.3796	-19.8864	-20.537	1.33871	0.546526	-21.374	-19.2549	-23.5238	-29.8553	-20.289	-14.2622	-21.4265	4.70428	1.92051		1.10244	2.32124	3.55832	1.55112	3.74201	5.64502	2.98669	1.52851	0.624012	0.954918	3.53165	0.848827
574	-9.86205	-13.0594	-11.121	-5.99654	-8.95943	-5.87239	-7.6726	2.59482	1.05933	10.8225	-0.585001	-0.804741	-2.2666	-4.03545	-4.42348	-0.215467	5.14501	2.10044	-21.9066	-22.1693	-19.0391	-19.3884	-20.3975	-19.8165	-20.4529	1.19718	0.488745	-21.0922	-19.0607	-23.1742	-30.2031	-19.711	-14.0726	-21.2189	4.87434	1.98994		0.985366	2.0769	3.17707	1.43127	4.72173	5.78455	3.02948	1.73762	0.709381	1.22732	3.8425	0.831356
588	-9.72523	-12.3112	-11.1911	-5.92116	-8.24235	-4.11793	-7.00167	2.86195	1.16839	11.6942	0.0307895	-0.368961	-1.88008	-3.02067	-3.52201	0.488879	5.17238	2.11161	-21.2329	-21.6771	-18.9745	-19.0675	-20.3975	-19.5019	-20.1419	1.04395	0.426191	-20.7575	-19.4668	-23.0169	-30.1212	-20.1156	-14.1105	-21.2647	4.78714	1.95434		1.0439	2.04815	2.76758	1.50318	4.83836	5.21481	2.90267	1.59452	0.65096	0.936758	4.06701	1.2332
602	-9.83468	-11.93	-11.107	-4.86571	-7.03912	-5.5094	-6.81223	2.72468	1.11235	11.3804	0.11876	-0.0029052	-0.944276	-2.24943	-2.1174	1.03085	4.71851	1.92632	-21.0981	-22.0217	-19.2006	-18.9784	-20.4153	-19.2573	-20.1619	1.12121	0.457734	-20.6166	-19.661	-22.8596	-29.9371	-21.2717	-13.7503	-21.3494	4.78138	1.95199		0.780488	1.67445	2.62638	1.28744	4.23187	4.85437	2.57583	1.50734	0.615369	1.0094	3.63526	1.18079
616	-9.27374	-11.0688	-10.6721	-5.01649	-5.8845	-7.85674	-7.00787	2.27499	0.928762	11.5722	0.259512	0.241132	-0.0898503	-1.66086	-2.62055	1.28359	4.72208	1.92778	-20.8623	-21.956	-18.7161	-19.0675	-20.7005	-18.8553	-20.0263	1.21685	0.496779	-20.4228	-19.8199	-22.8071	-29.8348	-21.5222	-14.1485	-21.4259	4.63992	1.89424		0.868293	1.73194	2.54165	1.13163	4.02193	4.84274	2.52303	1.46788	0.59926	0.973078	3.91158	1.61758
630	-9.21902	-11.0546	-10.7423	-4.37569	-5.71434	-10.0831	-7.34803	2.56063	1.04537	10.4563	1.06884	0.101682	-0.333972	-1.27524	-1.71908	1.3831	4.15739	1.69725	-20.8287	-21.9232	-19.0391	-19.1566	-20.7539	-19.3097	-20.1685	1.07195	0.437622	-20.2995	-19.5727	-22.7547	-30.2235	-21.9461	-14.5467	-21.5572	4.679	1.91019		0.882927	1.90442	2.38633	1.10766	4.29019	5.15668	2.62137	1.58616	0.647549	1.2818	4.06701	1.77482
644	-9.17797	-10.4334	-10.7142	-4.60185	-5.98173	-9.86529	-7.40671	2.32713	0.950048	10.8399	1.22718	0.415444	0.357706	-1.29554	-1.46751	1.67953	4.20748	1.71769	-20.6097	-22.2678	-19.0391	-19.0497	-20.6292	-18.9951	-20.0984	1.20337	0.491275	-20.4932	-19.661	-22.5275	-30.1417	-21.5029	-14.9259	-21.542	4.53391	1.85096		0.487805	1.66008	2.40045	1.47921	4.29019	5.43573	2.62558	1.70953	0.697913	1.191	4.27424	1.87965
658	-9.28742	-10.2781	-10.2934	-4.58929	-5.4105	-6.36848	-6.41392	2.33036	0.951367	12.008	1.50869	-0.316667	0.988353	-0.747556	-1.25786	2.0305	4.56343	1.86301	-20.9634	-22.235	-18.9906	-18.7822	-20.5579	-19.1	-20.1049	1.257	0.51317	-20.5109	-19.8376	-22.3527	-29.8962	-21.7341	-15.381	-21.6187	4.32777	1.7668		0.253659	1.45886	2.44281	1.34737	4.1269	5.28458	2.4857	1.72536	0.704377	1.17284	4.18789	2.00195
672	-9.49265	-10.2358	-9.46581	-3.92335	-4.66911	-2.53287	-5.1545	3.08618	1.25993	12.2347	1.54388	1.70535	1.63934	-0.747556	-1.32075	2.50916	4.51284	1.84236	-21.6539	-21.8576	-18.9583	-19.1388	-20.2192	-18.7505	-20.0964	1.2627	0.515494	-20.458	-19.8022	-21.9332	-29.8553	-22.158	-14.7173	-21.4873	4.47963	1.8288		0.531707	1.28638	2.23101	1.3234	3.777	5.09854	2.37467	1.58602	0.647488	1.31812	5.12046	1.98448
686	-9.58842	-9.30397	-8.90473	-4.13696	-3.79403	-3.67024	-5.29741	2.71018	1.10643	12.0429	2.21245	1.58334	2.0869	-0.930217	-0.440252	2.75918	4.32375	1.76516	-21.6034	-21.6278	-18.6677	-18.7644	-20.0588	-19.0301	-19.9587	1.25543	0.512527	-20.2642	-19.5374	-21.4962	-29.9575	-22.2543	-15.7223	-21.5387	4.29828	1.75476		0.268293	0.883938	2.20277	1.21553	3.3921	4.84274	2.13423	1.5712	0.641438	0.773317	5.44858	1.91459
700	-9.87573	-8.75335	-8.37171	-4.03644	-3.92772	-5.81189	-5.91294	2.33129	0.951745	12.3916	1.61425	1.68792	2.51411	0.551365	-0.628931	3.02172	4.30585	1.75785	-21.536	-21.7755	-18.7646	-18.6574	-19.6311	-19.1874	-19.9253	1.26516	0.5165	-20.458	-19.5904	-21.3214	-29.6302	-21.7726	-16.7841	-21.5928	3.93968	1.60837		0.107317	0.625225	2.30161	1.41928	3.84698	4.98227	2.21378	1.72875	0.70576	0.573556	5.39677	2.07184
714	-9.12325	-7.97685	-7.8948	-3.77258	-4.4625	-8.07453	-6.35821	2.00799	0.81976	12.6182	1.96613	1.98425	3.00236	0.855799	-0.0209644	3.40097	4.23025	1.72699	-21.755	-22.1693	-18.7	-18.4613	-20.0766	-19.3971	-20.0932	1.42367	0.581213	-20.2819	-19.6433	-20.9893	-29.6507	-21.7148	-17.9218	-21.7003	3.74686	1.52965		0.0780488	0.697089	2.25925	1.59907	4.03359	5.38922	2.34271	1.85009	0.755297	0.555396	5.5522	1.98448
[truncated: 70 more columns]

## Sheet: Fig 6E
	WT	Cas	KD	KO
	-11.4901	-13.8396	-23.5366	-17.9353
	-9.58028	-16.6136	-22.6416	-18.5751
	-10.7375	-14.8503	-17.1953	-27.6408
	-9.4928	-14.7023	-23.1575	-17.386
	-16.1069	-18.9544	-25.4103	-18.0078
	-17.1008	-15.7294	-22.6945	-21.1091
ANOVA analysis
Number of families	1
Number of comparisons per family	3
Alpha	0.05
Dunnett's multiple comparisons test	Mean Diff.	95.00% CI of diff.	Below threshold?	Summary	Adjusted P Value	A-?
WT vs. Cas	3.364	-1.124 to 7.851	No	ns	0.1699	B	Cas
WT vs. KD	10.02	5.534 to 14.51	Yes	****	<0.0001	C	KD
WT vs. KO	7.691	3.204 to 12.18	Yes	***	0.0009	D	KO
Test details	Mean 1	Mean 2	Mean Diff.	SE of diff.	n1	n2	q	DF
WT vs. Cas	-12.42	-15.78	3.364	1.766	6	6	1.904	20
WT vs. KD	-12.42	-22.44	10.02	1.766	6	6	5.674	20
WT vs. KO	-12.42	-20.11	7.691	1.766	6	6	4.354	20

## Sheet: Fig 6F
	WT	Cas9	KD	KO
	-15.1211	-10.8701	-23.4422	-21.1687
	-13.1467	-13.3362	-22.0473	-25.4322
	-13.6382	-13.9111	-25.0856	-24.0673
	-12.3528	-12.0567	-25.8732	-25.0269
	-17.6683	-7.78632	-22.7578	-22.1351
Number of families	1
Number of comparisons per family	3
Alpha	0.05
Dunnett's multiple comparisons test	Mean Diff.	95.00% CI of diff.	Below threshold?	Summary	Adjusted P Value	A-?
WT vs. Cas9	-2.793	-6.100 to 0.5135	No	ns	0.1069	B	Cas9
WT vs. KD	9.456	6.149 to 12.76	Yes	****	<0.0001	C	KD
WT vs. KO	9.181	5.874 to 12.49	Yes	****	<0.0001	D	KO
Test details	Mean 1	Mean 2	Mean Diff.	SE of diff.	n1	n2	q	DF
WT vs. Cas9	-14.39	-11.59	-2.793	1.275	5	5	2.19	16
WT vs. KD	-14.39	-23.84	9.456	1.275	5	5	7.413	16
WT vs. KO	-14.39	-23.57	9.181	1.275	5	5	7.198	16

## Sheet: Fig 6B
	WT	Cas9	KD	KO
	27.3826	22.2697	40.8241	41.1117
	26.7695	23.5589	39.5293	45.9859
	26.3776	22.5879	36.3621	37.2741
	24.826	22.9264	38.7524	36.6919
	23.899	23.7752	40.2999	38.1181
	25.7749	23.3823	38.8761	34.6177
Number of families	1
Number of comparisons per family	3
Alpha	0.05
Dunnett's multiple comparisons test	Mean Diff.	95.00% CI of diff.	Below threshold?	Summary	Adjusted P Value	A-?
WT vs. Cas9	2.755	-0.5878 to 6.098	No	ns	0.1203	B	Cas9
WT vs. KD	-13.27	-16.61 to -9.926	Yes	****	<0.0001	C	KD
WT vs. KO	-13.13	-16.47 to -9.786	Yes	****	<0.0001	D	KO
Test details	Mean 1	Mean 2	Mean Diff.	SE of diff.	n1	n2	q	DF
WT vs. Cas9	25.84	23.08	2.755	1.316	6	6	2.094	20
WT vs. KD	25.84	39.11	-13.27	1.316	6	6	10.09	20
WT vs. KO	25.84	38.97	-13.13	1.316	6	6	9.978	20

## Sheet: Fig 6C
	WT	Cas9	KD	KO
	9.65216	7.44225	23.4567	20.7602
	10.9424	8.96856	22.5817	23.6881
	11.9483	7.32092	24.0243	19.8574
	9.93348	7.08048	25.6904	18.0771
	12.1174	9.24086	25.3745	18.0472
	13.678	11.2337	24.7674	19.002
Number of families	1
Number of comparisons per family	3
Alpha	0.05
Dunnett's multiple comparisons test	Mean Diff.	95.00% CI of diff.	Below threshold?	Summary	Adjusted P Value	A-?
WT vs. Cas9	2.831	0.4236 to 5.238	Yes	*	0.0194	B	Cas9
WT vs. KD	-12.94	-15.34 to -10.53	Yes	****	<0.0001	C	KD
WT vs. KO	-8.527	-10.93 to -6.119	Yes	****	<0.0001	D	KO
Test details	Mean 1	Mean 2	Mean Diff.	SE of diff.	n1	n2	q	DF
WT vs. Cas9	11.38	8.548	2.831	0.9475	6	6	2.988	20
WT vs. KD	11.38	24.32	-12.94	0.9475	6	6	13.65	20
WT vs. KO	11.38	19.91	-8.527	0.9475	6	6	8.999	20
