# Supplementary material for: A novel mechanosensitive channel controls osmoregulation, differentiation, and infectivity in Trypanosoma cruzi
Source: eLife. 2021 Jul 2;10:e67449. doi: 10.7554/eLife.67449 (PMC8282336; doi:10.7554/eLife.67449)
Supplement: Figure 7—source data 1. [file elife-67449-fig7-data1.xlsx]

## Sheet: Fig 7 A
Time	Wt	KO
0	103.776	72.6654
1.6	103.399	64.7961
3.2	107.579	64.9757
4.8	128.54	80.2011
6.4	118.61	70.1559
8	106.049	69.5865
9.6	86.0975	64.9757
11.2	86.7895	64.9757
12.8	108.734	70.1559
14.4	106.813	72.2749
16	100.782	62.4943
17.6	104.909	63.3725
19.2	116.198	69.2088
20.8	111.453	69.3974
22.4	101.9	68.2714
24	111.453	63.5492
25.6	109.12	64.9757
27.2	106.049	64.9757
28.8	109.507	62.3197
30.4	103.023	66.7916
32	119.015	70.1559
33.6	116.198	73.0576
35.2	115.399	63.5492
36.8	104.531	64.2595
38.4	107.963	66.4255
40	109.507	70.5376
41.6	105.669	70.1559
43.2	99.3019	62.8445
44.8	104.909	68.6452
46.4	106.813	65.879
48	112.629	67.3437
49.6	101.9	74.4436
51.2	88.5299	69.7759
52.8	93.1274	68.0851
54.4	120.234	70.3466
56	118.61	67.7137
57.6	86.4432	63.5492
59.2	100.411	76.6639
60.8	118.206	71.6921
62.4	117.4	79.7781
64	122.281	80.8391
65.6	115.798	76.2563
67.2	115.798	81.2668
68.8	116.198	81.9119
70.4	106.049	82.7787
72	107.195	85.203
73.6	116.598	88.6076
75.2	147.071	86.5509
76.8	108.734	82.3443
78.4	109.12	82.1279
80	134.113	90.2369
81.6	158.381	90.2369
83.2	164.249	88.6076
84.8	164.744	88.8387
86.4	156.937	94.5505
88	175.916	94.0622
89.6	190.917	112.94
91.2	173.331	108.669
92.8	167.238	102.427
94.4	183.839	102.691
96	185.995	101.377
97.6	190.917	108.669
99.2	199.341	110.642
100.8	199.913	118.592
102.4	209.832	113.814
104	185.995	114.4
105.6	205.117	124.215
107.2	218.295	116.777
108.8	206.875	112.65
110.4	189.815	111.498
112	173.845	110.642
113.6	179.581	116.477
115.2	208.645	123.577
116.8	220.764	114.99
118.4	213.425	117.681
120	174.361	120.437
121.6	191.47	129.115
123.2	211.622	122.311
124.8	219.526	117.681
126.4	220.144	130.456
128	250.908	123.577
129.6	240.042	130.456
131.2	240.042	127.131
132.8	247.466	130.456
134.4	254.392	131.132
136	234.113	135.62
137.6	228.949	135.269
139.2	213.425	122.311
140.8	247.466	140.277
142.4	216.458	138.465
144	214.634	134.919
145.6	209.832	131.132
147.2	250.908	140.642
148.8	256.503	133.528
150.4	279.282	125.502
152	238.713	115.88
153.6	228.311	135.269
155.2	227.038	125.179
156.8	260.773	133.874
158.4	237.391	139.549
160	244.743	133.874
161.6	238.051	131.812
163.2	239.377	134.57
164.8	251.601	129.783
166.4	242.047	136.679
168	252.993	144.356
169.6	246.102	135.62
171.2	244.743	145.112
172.8	271.529	134.222
174.4	247.466	144.356
176	249.526	136.679
177.6	262.211	135.972
179.2	220.144	132.153
180.8	219.526	142.486
182.4	245.422	150.136
184	260.773	147.406
185.6	252.296	146.254
187.2	230.874	149.35
188.8	246.102	144.356
190.4	246.783	136.325
192	260.057	134.919
193.6	274.731	159.1
195.2	250.908	137.748
196.8	245.422	144.356
198.4	262.211	140.642
200	248.151	133.874
201.6	261.491	140.642
203.2	260.057	152.521
204.8	263.656	141.745
206.4	313.234	153.73
208	279.282	159.1
209.6	265.838	133.874
211.2	292.569	142.486
212.8	254.392	163.38
214.4	276.998	148.569
216	293.369	150.53
217.6	296.592	144.733
219.2	268.036	153.73
220.8	247.466	151.323
222.4	268.036	155.36
224	263.656	149.742
225.6	272.482	142.486
227.2	252.993	143.605
228.8	268.772	140.642
230.4	296.592	135.972
232	280.047	146.254
233.6	282.355	147.793
235.2	298.216	162.946
236.8	289.389	141.009
238.4	308.147	147.793
240	293.369	158.26
241.6	339.984	146.254
243.2	276.998	180.954
244.8	291.529	165.571
246.4	292.569	143.98
248	293.234	152.521
249.6	271.736	157.425
251.2	281.584	154.95
252.8	322.783	154.542
254.4	314.949	144.356
256	303.141	125.179
257.6	304.801	144.733
259.2	285.461	159.945
260.8	305.634	151.323
262.4	314.949	152.521
264	313.234	145.872
265.6	304.801	150.926
267.2	329.013	161.652
268.8	322.783	139.912
270.4	321.903	150.53
272	320.15	156.182
273.6	315.81	142.858
275.2	315.81	137.391
276.8	319.277	150.926
278.4	326.372	150.53
280	301.491	143.98
281.6	327.221	148.959
283.2	340.915	148.18
284.8	302.315	152.521
286.4	263.656	162.082
288	299.031	141.009
289.6	339.984	141.745
291.2	280.815	150.136
292.8	277.757	139.912
294.4	308.147	142.486
296	320.15	157.841
297.6	315.81	150.53
299.2	320.15	143.98
300.8	303.141	157.425
302.4	307.307	147.021
304	336.286	155.36
305.6	359.131	154.136
307.2	336.286	146.637
308.8	329.914	146.637
310.4	314.949	158.679
312	287.812	167.797
313.6	287.812	156.182
315.2	308.989	147.021
316.8	353.269	159.522
318.4	292.569	168.698
320	272.482	146.637
321.6	344.667	149.35
323.2	295.783	144.733
324.8	314.949	142.858
326.4	320.15	147.021
328	287.812	163.815
329.6	284.682	169.15
331.2	357.165	166.457
332.8	329.013	171.434
334.4	296.592	172.823
336	306.469	156.182
337.6	327.221	166.457
339.2	329.914	166.457
340.8	321.903	172.823
342.4	356.187	166.457
344	356.187	169.15
345.6	326.328	166.013
347.2	329.013	161.223
348.8	343.725	150.53
350.4	339.056	167.349
352	358.146	157.425
353.6	339.056	162.513
355.2	338.13	159.945
356.8	338.13	162.082
358.4	290.181	140.642
360	305.634	135.269
361.6	361.107	174.695
363.2	359.131	160.796
364.8	367.109	148.959
366.4	335.368	164.252
368	405.498	166.457
369.6	349.418	170.975
371.2	347.51	145.112
372.8	328.116	151.323
374.4	351.338	166.457
376	333.539	176.593
377.6	337.206	176.116
379.2	369.319	170.975
380.8	359.131	159.1
382.4	339.984	152.923
384	337.206	155.36
385.6	379.439	160.796
387.2	361.107	159.945
388.8	379.439	169.15
390.4	374.247	170.516
392	369.133	161.652
393.6	378.394	164.252
395.2	381.538	172.359
396.8	334.452	167.349
398.4	349.418	159.945
400	414.627	178.032
401.6	344.667	162.513
403.2	333.539	176.116
404.8	342.786	174.225
406.4	367.109	184.944
408	360.117	180.463
409.6	334.452	173.756
411.2	329.013	173.756
412.8	357.165	175.167
414.4	369.133	172.359
416	359.131	183.435
417.6	344.667	192.193
419.2	382.592	203.184
420.8	397.696	216.229
422.4	387.912	218.092
424	317.539	212.565
425.6	351.338	224.457
427.2	302.315	207.806
428.8	372.192	216.848
430.4	422.809	232.427
432	369.133	228.395
433.6	354.239	216.848
435.2	370.15	240.071
436.8	413.473	218.717
438.4	408.894	221.244
440	377.353	253.339
441.6	382.592	231.072
443.2	370.15	237.953
444.8	414.627	262.754
446.4	345.612	286.727
448	381.538	269.304
449.6	367.109	222.522
451.2	375.279	246.582
452.8	413.473	244.385
454.4	410.034	248.807
456	452.32	247.321
457.6	523.659	280.451
459.2	596.877	262.754
460.8	695.193	270.978
462.4	739.302	252.576
464	749.086	270.978
465.6	809.086	257.204
467.2	792.788	257.204
468.8	751.561	272.666
470.4	999.368	276.088
472	849.054	256.424
473.6	774.364	269.304
475.2	952.084	304.82
476.8	955.6	284.914
478.4	948.588	267.645
480	1050.33	256.424
481.6	1184.58	299.902
483.2	1165.17	326.827
484.8	966.265	291.335
486.4	911.371	274.369
488	1256.73	303.827
489.6	1034.23	284.013
491.2	988.145	345.218
492.8	1046.27	352.518
494.4	1417.58	331.285
496	1062.66	347.626
497.6	1165.17	342.835
499.2	1014.64	308.84
500.8	1038.22	331.285
502.4	1385.35
504	1312.69
505.6	1354.3
507.2	1437.51
508.8	1379.05
510.4	1204.51
512	1464.82
513.6	1665.46
515.2	1492.99
516.8
518.4
520
521.6
523.2
524.8
526.4
528
529.6
531.2
532.8
534.4
536
537.6
539.2
540.8
542.4
544
545.6
547.2
548.8
550.4
552
553.6
555.2
556.8
558.4
560
561.6
563.2
564.8
566.4
568
569.6
571.2
572.8
574.4
576
577.6
579.2
580.8
582.4
584
585.6
587.2
588.8
590.4
592
593.6
595.2
596.8
598.4
600

## Sheet: Fig 7C
Time	WT	KO
0	115.681	95.9856
1.6	135.368	92.7845
3.2	138.763	92.4207
4.8	122.544	90.7677
6.4	113.154	88.7503
8	108.831	86.108
9.6	107.087	86.8356
11.2	113.895	95.4852
12.8	122.677	96.0018
14.4	137.31	89.3518
16	133.792	85.9208
17.6	135.181	92.0108
19.2	124.628	99.7733
20.8	124.891	99.4068
22.4	126.317	92.4589
24	124.491	90.9811
25.6	122.179	82.197
27.2	115.408	85.1805
28.8	121.669	89.9565
30.4	122.684	92.7521
32	122.938	108.616
33.6	115.914	115.479
35.2	121.314	114.684
36.8	123.396	78.4049
38.4	128.994	73.0622
40	122.328	83.0463
41.6	120.502	98.9759
43.2	116.182	107.527
44.8	118.745	106.159
46.4	119.78	100.713
48	119.78	101.898
49.6	116.474	100.566
51.2	121.411	100.018
52.8	118.888	101.231
54.4	119.134	100.857
56	117.715	104.054
57.6	132.753	96.831
59.2	150.224	96.4602
60.8	146.445	99.6714
62.4	137.69	112.514
64	128.243	108.957
65.6	132.302	105.552
67.2	132.582	95.9969
68.8	136.48	104.202
70.4	135.091	98.72
72	132.897	97.2307
73.6	123.253	96.4249
75.2	114.701	106.571
76.8	107.234	113.661
78.4	99.5803	106.951
80	99.121	99.1032
81.6	109.062	98.8921
83.2	120.475	107.226
84.8	128.941	107.408
86.4	130.368	103.556
88	129.814	99.7799
89.6	127.688	107.873
91.2	127.4	122.95
92.8	124.715	154.98
94.4	122.926	162.818
96	112.779	142.917
97.6	115.464	110.316
99.2	127.578	126.519
100.8	160	154.183
102.4	196.497	187.806
104	223.629	201.923
105.6	239.211	202.519
107.2	234.353	182.478
108.8	231.479	156.273
110.4	214.235	147.141
112	214.235	154.481
113.6	246.093	169.57
115.2	259.724	183.04
116.8	260.195	189.842
118.4	235.757	172.658
120	237.799	160.222
121.6	237.328	165.437
123.2	236.292	177.694
124.8	233.251	190.776
126.4	257.593	182.509
128	269.281	177.649
129.6	268.296	168.339
131.2	245.856	204.696
132.8	245.256	208.614
134.4	250.854	215.696
136	265.828	178.452
137.6	270.764	180.028
139.2	263.714	193.171
140.8	244.081	203.697
142.4	223.575	215.958
144	230.625	206.025
145.6	242.384	199.437
147.2	235.949	191.467
148.8	259.335	187.327
150.4	259.871	184.275
152	261.199	174.781
153.6	233.697	150.311
155.2	222.309	135.421
156.8	207.253	144.236
158.4	262.227	172.847
160	264.953	188.939
161.6	302.501	183.131
163.2	340.642	185.137
164.8	273.735	201.675
166.4	290.711	200.454
168	272.308	197.145
169.6	260.242	182.456
171.2	248.321	184.608
172.8	267.325	194.332
174.4	282.299	204.849
176	273.075	211.785
177.6	259.359	210.672
179.2	261.769	208.857
180.8	244.346	208.857
182.4	242.376	204.928
184	232.092	203.511
185.6	251.274	211.656
187.2	264.005	215.585
188.8	337.081	213.515
190.4	340.105	194.204
192	348.034	181.838
193.6	288.364	178.528
195.2	288.984	184.665
196.8	284.008	200.425
198.4	327.974	244.882
200	434.808	324.069
201.6	526.016	420.47
203.2	575.2	486.664
204.8	594.113	523.937
206.4	678.464	506.436
208	756.537	519.599
209.6	919.858	496.941
211.2	807.103	516.688
212.8	711.094	503.525
214.4	646.269	523.826
216	802.914	547.519
217.6	939.293	556.949
219.2	988.331	562.929
220.8	965.516	503.594
222.4	924.01	429.155
224	995.865	459.631
225.6	925.414	475.526
227.2	960.988	460.177
228.8	937.625	548.144
230.4	1098.14	644.357
232	1107.39	687.889
233.6	1321.61	689.312
235.2	1349	615.136
236.8	1312.21	543.226
238.4	1396	519.736
240	1330.5	541.14
241.6	1374.02	544.339
243.2	1368.43	605.387
244.8	1308.39	626.116
246.4	1408.39	625.04
248	1482.05	540.36
249.6	1473.06	509.101
251.2	1474.61	522.717
252.8	1562.24	577.192
254.4	1612.51	599.177
256	1790.45	604.08
257.6	1700.15	623.502
259.2	1755.84	606.674
260.8	1878.04	571.276
262.4	1784.33	538.896
264	1796.6	568.231
265.6	1796.6	622.46
267.2	1805.73	596.521
268.8	1848.4	606.682
270.4	1807.83	586.608
272	1840.43	611.183
273.6	1989.22	627.861
275.2	2122.1	703.903
276.8	2152.55	696.007
278.4	2267.12	653.702
280	2153.31	691.48
281.6	2157.98	690.21
283.2	2232.05	707.319
284.8	2133.34	617.986
286.4	2116.04	602.577
288	2273.06	571.597
289.6	2213.79	564.323
291.2	2266.08	573.572
292.8	2283.7	568.415
294.4	2254.64	577.192
296	2273.41	593.882
297.6	2222.12	615.867
299.2	2211.76	556.648
300.8	2299.97	544.862
302.4	2283.89	582.263
304	2346.25	613.042
305.6	2708.76	675.631
307.2	1326.73	683.563
308.8	1170.71	753.814
310.4	1837.61	783.87
312	2547.36	717.82
313.6	2164.38	777.522
315.2	1332.31	841.857
316.8	1752.27
318.4	2306.63
320	2490.74
321.6
323.2
324.8
326.4
328
329.6
331.2
332.8
334.4
336
337.6
339.2
340.8
342.4
344
345.6
347.2
348.8
350.4
352
353.6
355.2
356.8
358.4
360
361.6
363.2
364.8
366.4
368
369.6
371.2
372.8
374.4
376
377.6
379.2
380.8
382.4
384
385.6
387.2
388.8
390.4
392
393.6
395.2
396.8
398.4
400
401.6
403.2
404.8
406.4
408
409.6
411.2
412.8
414.4
416
417.6
419.2
420.8
422.4
424
425.6
427.2
428.8
430.4
432
433.6
435.2
436.8
438.4
440
441.6
443.2
444.8
446.4
448
449.6
451.2
452.8
454.4
456
457.6
459.2
460.8
462.4
464
465.6
467.2
468.8
470.4
472
473.6
475.2
476.8
478.4
480
481.6
483.2
484.8
486.4
488
489.6
491.2
492.8
494.4
496
497.6
499.2
500.8
502.4
504
505.6
507.2
508.8
510.4
512
513.6
515.2
516.8
518.4
520
521.6
523.2
524.8
526.4
528
529.6
531.2
532.8
534.4
536
537.6
539.2
540.8
542.4
544
545.6
547.2
548.8
550.4
552
553.6
555.2
556.8
558.4
560
561.6
563.2
564.8
566.4
568
569.6
571.2
572.8
574.4
576
577.6
579.2
580.8
582.4
584
585.6
587.2
588.8
590.4
592
593.6
595.2
596.8
598.4
600

## Sheet: Fig 7B
	WT	KO	WT-A	KO-A
	88.1725	80.734	174.752	174.54
	108.399	89.1815	216.474	117.952
	105.472	95.1652	200.667	147.939
	116.191	65.3817	187.595	168.746
	120.842	88.0436	252.105	179.27
	152.986	90.3342	198.315	169.182
	81.1025	72.7257	215.472	159.273
	99.2798	69.4275
	96.5153
	122.664
	95.3577
	96.3781
ANOVA summary
F	63.79
P value	<0.0001
P value summary	****
Significant diff. among means (P < 0.05)?	Yes
R squared	0.8645
ANOVA table	SS	DF	MS	F (DFn, DFd)	P value
Treatment (between columns)	72184	3	24061	F (3, 30) = 63.79	P<0.0001
Residual (within columns)	11315	30	377.2
Total	83499	33
Number of families	1
Number of comparisons per family	2
Alpha	0.05
Šídák's multiple comparisons test	Mean Diff.	95.00% CI of diff.	Below threshold?	Summary	Adjusted P Value
WT vs. KO	25.57	4.706 to 46.44	Yes	*	0.0143	A-B
WT-A vs. KO-A	46.93	22.49 to 71.36	Yes	***	0.0002	C-D
Test details	Mean 1	Mean 2	Mean Diff.	SE of diff.	n1	n2	t	DF
WT vs. KO	106.9	81.37	25.57	8.864	12	8	2.885	30
WT-A vs. KO-A	206.5	159.6	46.93	10.38	7	7	4.52	30

## Sheet: Fig 7D
	WT	KO	WT-BK	KO-BK	WT-BK-Ca	KO-BK-Ca
	88.1725	80.734	140.789	186.799	927.488	609.892
	108.399	89.1815	209.614	294.864	952.977	744.422
	105.472	95.1652	344.404	291.907	1776.9	744.422
	116.191	65.3817	252.906	289.667	1465.39	952.782
	120.842	88.0436	236.928	265.809	1280.69	973.441
	152.986	90.3342				820.134
	81.1025	72.7257
	99.2798	69.4275
	96.5153
	122.664
	95.3577
	96.3781
ANOVA summary
F	75.38
P value	<0.0001
P value summary	****
Significant diff. among means (P < 0.05)?	Yes
R squared	0.915
ANOVA table	SS	DF	MS	F (DFn, DFd)	P value
Treatment (between columns)	6928139	5	1385628	F (5, 35) = 75.38	P<0.0001
Residual (within columns)	643359	35	18382
Total	7571498	40
Number of families	1
Number of comparisons per family	3
Alpha	0.05
Šídák's multiple comparisons test	Mean Diff.	95.00% CI of diff.	Below threshold?	Summary	Adjusted P Value
WT vs. KO	25.57	-129.6 to 180.7	No	ns	0.9678	A-B
WT-BK vs. KO-BK	-28.88	-243.9 to 186.1	No	ns	0.9821	C-D
WT-BK-Ca vs. KO-BK-Ca	473.2	267.3 to 679.0	Yes	****	<0.0001	E-F
Test details	Mean 1	Mean 2	Mean Diff.	SE of diff.	n1	n2	t
WT vs. KO	106.9	81.37	25.57	61.88	12	8	0.4132
WT-BK vs. KO-BK	236.9	265.8	-28.88	85.75	5	5	0.3368
WT-BK-Ca vs. KO-BK-Ca	1281	807.5	473.2	82.1	5	6	5.764
