# Supplementary material for: A novel mechanosensitive channel controls osmoregulation, differentiation, and infectivity in Trypanosoma cruzi
Source: eLife. 2021 Jul 2;10:e67449. doi: 10.7554/eLife.67449 (PMC8282336; doi:10.7554/eLife.67449)
Supplement: Figure 8—source data 1. [file elife-67449-fig8-data1.xlsx]

## Sheet: Fig 8 B
	WT	KO				WT	KO
	10.67	0.1			Number of values	5	5
	8.94	0.15
	6.63	0.65			Minimum	6.63	0.1
	10.4	0.64			Maximum	10.67	0.65
	9.16	0.38			Range	4.04	0.55
					Mean	9.16	0.384
					Std. Deviation	1.602	0.2606
Unpaired t test					Std. Error of Mean	0.7165	0.1166
P value	<0.0001
P value summary	****
Significantly different (P < 0.05)?	Yes
One- or two-tailed P value?	Two-tailed
t, df	t=12.09, df=8
How big is the difference?
Mean of column A	9.16
Mean of column B	0.384
Difference between means (B - A) ± SEM	-8.776 ± 0.7259
95% confidence interval	-10.45 to -7.102
R squared (eta squared)	0.9481
F test to compare variances
F, DFn, Dfd	37.79, 4, 4
P value	0.0039
P value summary	**
Significantly different (P < 0.05)?	Yes
Data analyzed
Sample size, column A	5
Sample size, column B	5

## Sheet: Fig 8C
		WT	Cas9	KD	KO
	Exp 1	66.1538	68.4615	36	28.0851
	Exp 2	68.9655	65.5814	33	28.2051
	Exp 3	55.3947	48.4615	39	23.4375
	Exp 4	60	65.4676	38	25
	Exp 5	71.6418	58.2956	40	14
ANOVA summary
F	50.5
P value	<0.0001
P value summary	****
Significant diff. among means (P < 0.05)?	Yes
R squared	0.9045
ANOVA table	SS	DF	MS	F (DFn, DFd)	P value
Treatment (between columns)	5717	3	1906	F (3, 16) = 50.50	P<0.0001
Residual (within columns)	603.8	16	37.74
Total	6321	19
Multiple comparison
Number of families	1
Number of comparisons per family	3
Alpha	0.05
Dunnett's multiple comparisons test	Mean Diff.	95.00% CI of diff.	Below threshold?	Summary	Adjusted P Value	A-?
WT vs. Cas9	3.178	-6.895 to 13.25	No	ns	0.754	B	Cas9
WT vs. KD	27.23	17.16 to 37.30	Yes	****	<0.0001	C	KD
WT vs. KO	40.69	30.61 to 50.76	Yes	****	<0.0001	D	KO
Test details	Mean 1	Mean 2	Mean Diff.	SE of diff.	n1	n2	q	DF
WT vs. Cas9	64.43	61.25	3.178	3.885	5	5	0.8179	16
WT vs. KD	64.43	37.2	27.23	3.885	5	5	7.009	16
WT vs. KO	64.43	23.75	40.69	3.885	5	5	10.47	16

## Sheet: Fig 8D
											day 6 reduced
2018-03-09											WT	Cas9	KO
Days	4	5	6		Cummulatives	4	5	6			3.92	4.1	0.995
											2.62	5.96	0.524
WT	669600	3500000	11200000		WT	669600	4169600	15369600			4.65	2.24	0.345
Cas9 scrambled	6500000	6300000	28200000		Cas9 scrambled	6500000	12800000	41000000			3.7	4.21	0.782
TcMscS knockout	347000	788000	1500000		TcMscS knockout	347000	1135000	2635000			2.82	3.78	0.676
											3.85	4.37	0.356
											4.37	2.65	0.898
2018-03-20											2.56	3.21	0.656
Days	4	5	6		Cummulatives	4	5	6			5.21	4.55	0.498
WT	4200000	20000000	15000000		WT	4200000	24200000	39200000
Cas9 scrambled	4220000	25000000	45000000		Cas9 scrambled	4220000	29220000	74220000
TcMscS knockout	551200	3200000	6200000		TcMscS knockout	551200	3751200	9951200
2018-03-26
Days	4	5	6		Cummulatives	4	5	6
WT	1930000	6300000	18000000		WT	1930000	8230000	26230000
Cas9 scrambled	4250000	4300000	51000000		Cas9 scrambled	4250000	8550000	59550000
TcMscS knockout 1	427600	940400	3870000		TcMscS knockout	427600	1368000	5238000
TcMscS knockout 2	449600	915400	3480000		TcMscS knockout	449600	1365000	4845000
2018-04-10
Days	4	5	6		Cummulatives	4	5	6
WT	1640000	12300000	32600000		WT	1640000	13940000	46540000
Cas9 scrambled	1200000	5000000	16200000		Cas9 scrambled	1200000	6200000	22400000
TcMscS knockout 1	289400				TcMscS knockout	289400
TcMscS knockout 2	435000	1100000	1910000		TcMscS knockout	435000	1535000	3445000
	WT			Cas9			KO
	Mean	SEM	N	Mean	SEM	N	Mean	SEM	N
Day 4	2.59	0.8	9	3.22	1.0117	9	0.42	0.0756143	9
Day 5	15.46	4.67	9	14.66	7.3132	9	2.56	0.972937	9
Day 6	37.32	5.93	9	40.98	10.7243	9	6.21	1.92416	9
ANOVA summary
F	42.58
P value	<0.0001
P value summary	****
Significant diff. among means (P < 0.05)?	Yes
R squared	0.7801
ANOVA table	SS	DF	MS	F (DFn, DFd)	P value
Treatment (between columns)	60.93	2	30.46	F (2, 24) = 42.58	P<0.0001
Residual (within columns)	17.17	24	0.7155
Total	78.1	26
Number of families	1
Number of comparisons per family	2
Alpha	0.05
Dunnett's multiple comparisons test	Mean Diff.	95.00% CI of diff.	Below threshold?	Summary	Adjusted P Value	A-?
WT vs. Cas9	-0.1522	-1.089 to 0.7846	No	ns	0.8999	B	Cas9
WT vs. KO	3.108	2.171 to 4.045	Yes	****	<0.0001	C	KO
Test details	Mean 1	Mean 2	Mean Diff.	SE of diff.	n1	n2	q	DF
WT vs. Cas9	3.744	3.897	-0.1522	0.3987	9	9	0.3817	24
WT vs. KO	3.744	0.6367	3.108	0.3987	9	9	7.794	24
